# 1 **A synthetic biology approach to probing nucleosome symmetry**

2

3 Yuichi Ichikawa<sup>1,\*</sup>, Caitlin F. Connelly<sup>2,\*</sup>, Alon Appleboim<sup>3,4,\*</sup>, Thomas C. Miller<sup>5</sup>, Hadas  
4 Jacobi<sup>3,4</sup>, Nebiyu A. Abshiru<sup>6</sup>, Hsin-Jung Chou<sup>2</sup>, Yuanyuan Chen<sup>1</sup>, Upasna Sharma<sup>2</sup>,  
5 Yupeng Zheng<sup>6</sup>, Paul M. Thomas<sup>6</sup>, Hsiuyi V. Chen<sup>2</sup>, Vineeta Bajaj<sup>1</sup>, Christoph W.  
6 Müller<sup>5</sup>, Neil L. Kelleher<sup>6</sup>, Nir Friedman<sup>3,4</sup>, Daniel N. Bolon<sup>2</sup>, Oliver J. Rando<sup>2,†</sup>, and Paul  
7 D. Kaufman,<sup>1,†</sup>

8

9 <sup>1</sup>*Department of Molecular, Cell, and Cancer Biology, University of Massachusetts*  
10 *Medical School, Worcester, MA 01605, USA*

11 <sup>2</sup>*Department of Biochemistry and Molecular Pharmacology, University of Massachusetts*  
12 *Medical School, Worcester, MA 01605, USA*

13 <sup>3</sup>*School of Computer Science and Engineering, The Hebrew University, Jerusalem*  
14 *91904, Israel*

15 <sup>4</sup>*Alexander Silberman Institute of Life Sciences, The Hebrew University, Jerusalem*  
16 *91904, Israel*

17 <sup>5</sup>*European Molecular Biology Laboratory (EMBL), Structural and Computational Biology*  
18 *Unit, Meyerhofstrasse 1, 69117 Heidelberg, Germany*

19 <sup>6</sup>*National Resource for Translational and Developmental Proteomics, Northwestern*  
20 *University, Evanston, IL 60208 USA*

21

22 *\*Indicates authors contributing equally*

23

24 *†To whom correspondence should be addressed.*

25 *E-mail: [Oliver.Rando@umassmed.edu](mailto:Oliver.Rando@umassmed.edu)*

26 *E-mail: [Paul.Kaufman1@umassmed.edu](mailto:Paul.Kaufman1@umassmed.edu)*

27

## 28 **ABSTRACT**

29 The repeating subunit of chromatin, the nucleosome, includes two copies of each of the  
30 four core histones, and several recent studies have reported that asymmetrically-  
31 modified nucleosomes occur at regulatory elements in vivo. To probe the mechanisms  
32 by which histone modifications are read out, we designed an obligate pair of H3  
33 heterodimers, termed H3X and H3Y, which we extensively validated genetically and  
34 biochemically. Comparing the effects of asymmetric histone tail point mutants with those  
35 of symmetric double mutants revealed that a single methylated H3K36 per nucleosome  
36 was sufficient to silence cryptic transcription in vivo. We also demonstrate the utility of  
37 this system for analysis of histone modification crosstalk, using mass spectrometry to  
38 separately identify modifications on each H3 molecule within asymmetric nucleosomes.  
39 The ability to generate asymmetric nucleosomes in vivo and in vitro provides a powerful  
40 and generalizable tool to probe the mechanisms by which H3 tails are read out by  
41 effector proteins in the cell.

42

43

## 44 **INTRODUCTION**

45 Packaging of eukaryotic genomes into chromatin has widespread consequences for  
46 genomic function, as nucleosomes generally impede the access of proteins to the  
47 underlying DNA (1). In addition, the histone proteins are subject to a huge variety of  
48 covalent modifications, which affect genomic function in ways ranging from direct  
49 alterations in the biophysical nature of the chromatin fiber to recruitment or activation of  
50 various regulatory proteins.

51 The histone octamer is comprised of two copies of each of the four histones H2A,  
52 H2B, H3, and H4, organized with two H2A/H2B dimers associated with a central core  
53 tetramer of histone H3 and H4 (2). The symmetry inherent to the histone octamer has  
54 long been appreciated, and it has been suggested that chromatin function may be  
55 regulated at the level of histone modification symmetry – that K4me3/K4me0 and  
56 K4me3/K4me3 nucleosomes might serve distinct functions in vivo, for example. Indeed,

57 increasing evidence supports the existence of asymmetrically-modified nucleosomes in  
58 vivo. In mammals, immunopurification and mass spectrometry of nucleosomes marked  
59 with H3K27me3 revealed a mixture of symmetrically-modified nucleosomes as well as  
60 asymmetric nucleosomes modified on only one H3 tail (3). More recent single molecule  
61 studies of H3K4me3/K27me3-marked “bivalent” nucleosomes reveal that the vast  
62 majority of these nucleosomes are asymmetrically modified, with each H3 tail bearing  
63 one of the two methylation marks, rather than both marks co-occurring on the same H3  
64 molecule (4). In budding yeast, ChIP-Exo and chemical mapping studies identified a  
65 subset of nucleosomes that exhibit asymmetric contacts with the underlying genomic  
66 DNA (5, 6), suggested to reflect histone octamers associated with an asymmetrically-  
67 localized DNA bulge.

68 While evidence therefore increasingly supports the hypothesis that nucleosomes  
69 across the genome – particularly at regulatory regions – can be modified  
70 asymmetrically, at present it is largely unknown whether nucleosome symmetry affects  
71 genomic functions such as transcription. For instance, do any chromatin regulators bind  
72 specifically to singly-modified nucleosomes, or to doubly-modified nucleosomes? A  
73 handful of studies in vitro have suggested that chromatin regulators can distinguish  
74 singly-modified from doubly-modified nucleosomes. For instance, Li *et al* assembled  
75 and purified asymmetric nucleosomes lacking a single H3 tail in vitro, subsequently  
76 showing that the histone acetyltransferase Gcn5 exhibited cooperative binding to two  
77 histone tails (7, 8). Conversely, asymmetrically H3K4-methylated nucleosomes were,  
78 like unmodified nucleosomes, efficiently methylated at K27 by the PRC2 complex,  
79 whereas this methylation was inhibited by the presence of symmetric H3K4me3 marks  
80 (3). Although these in vitro studies generate hypotheses for how chromatin effectors  
81 might be affected by nucleosome symmetry in the cell, the inherent symmetry of the  
82 natural H3-H3 interface has made in vivo tests of these hypotheses impossible until  
83 now.

84 Here, we develop a novel system to enable analysis of the functional  
85 consequences of nucleosome symmetry in vivo. Using rational design, followed by in  
86 vivo optimization and selection, we developed a pair of H3 proteins – H3X and H3Y –  
87 that form heterodimers in vivo, yet cannot homodimerize. We validated this system

88 genetically and biochemically in budding yeast, confirming that the vast majority of  
89 histone octamers in the cell contain a heterodimeric H3X/H3Y at their core.  
90 Furthermore, we confirm that the engineered specificities are recapitulated in vitro  
91 during biochemical reconstitution of histone octamers with recombinant subunits. We  
92 then used this system to probe several mechanistic aspects of nucleosome function in  
93 vivo, finding that a single copy of H3K36 is sufficient for stress resistance, and to silence  
94 cryptic transcription, in vivo. In addition, we show that disruption of H3S10 affects H3K9  
95 acetylation only on the same tail, demonstrating the utility of this approach for  
96 interrogating histone “crosstalk”. This system thus represents a powerful approach to  
97 mechanistically probe the role of histone stoichiometry and symmetry in a variety of  
98 aspects of chromatin biology.

99

100

## 101 **RESULTS**

### 102 **Design and validation of obligate heterodimers**

103 The histone octamer is built on a central core tetramer of histone H3 and H4,  
104 assembled around a central H3-H3 homodimeric interface (9). In order to develop a  
105 system to analyze the role of nucleosome symmetry in chromatin regulation in vivo, we  
106 set out to design a pair of H3 molecules – “H3X” and “H3Y” – which cannot form X/X or  
107 Y/Y homodimers, but will efficiently form H3X/H3Y heterodimers (**Figure 1A**). We  
108 initially used protein design to develop six sets of H3 mutants that are predicted to have  
109 much higher affinity with a paired mutant protein than with wild-type H3. Each  
110 engineered variant has “bumps and holes” that are also predicted to reduce the  
111 potential for homodimerization. We focused our efforts on the hydrophobic cluster  
112 formed by amino acids L109, A110, L126, and L130 (**Figure 1B**) in the nucleosome  
113 structure (pdb 1kx3). At these positions, sequence and conformational space were  
114 enumerated using a rotamer description of side chain geometry and a molecular  
115 mechanics force-field (10) to generate a pairwise energy matrix. We used a previously  
116 described algorithm (11) to identify sequences that preferentially energetically partition  
117 as heterodimers.



118 We then carried out genetic tests of six initial designs in vivo, reasoning that  
119 budding yeast carrying both H3X and H3Y should be viable, but yeast carrying H3X  
120 alone or H3Y alone would be inviable due to the failure of these H3 molecules to  
121 homodimerize. In our initial tests, one of the original six designs (H3X = L126V, L130V;  
122 H3Y= L109I, A110W, L130I) exhibited most of the expected growth behaviors.  
123 However, although yeast carrying H3Y alone exhibited no growth even after 21 days of  
124 culture (**Figure 1C** and not shown), H3X-only strains did grow even in the absence of  
125 H3Y, albeit poorly – colonies were only observed after nine or more days of growth of  
126 these strains (**Figure 1 – Figure Supplement 1A**), in contrast to the abundant colonies  
127 observed for H3X/H3Y strains after just two or three days. As homodimerization of H3X  
128 even at low levels could complicate interpretation of this system, we carried out a round  
129 of in vivo selection to optimize the H3X interface (**Figure 1 – Figure Supplement 1B-**  
130 **C**). We randomized each of the H3/H3 interface residues on the backbone of the initial  
131 H3X gene, generating libraries of yeast strains bearing these mutant “H3X\*” molecules  
132 paired with our previously-selected H3Y design. Strains that grew robustly with  
133 H3X\*/H3Y pairs were then re-tested for growth in the absence of the H3Y. In this  
134 manner, we identified four final versions of H3X (named 126A, 130A, 130T, and 130Q  
135 for the additional substitutions on the original H3X backbone) that reproducibly  
136 conferred robust growth in the presence of H3Y but were completely inviable in its  
137 absence (**Figure 1D-E**). We obtained multiple isolates encoding each of these amino  
138 acid substitutions (13, 5, 5, and 5, respectively), suggesting that we had adequately  
139 surveyed the possible codons. Consistent with our observation that these residues are  
140 sensitive points for H3/H3 dimeric interactions, L126A and L130A mutations cause  
141 lethality when present on symmetric H3 molecules (12).

142 Although these genetic tests suggest that H3X or H3Y alone do not  
143 homodimerize efficiently enough to support growth, the possibility remains that in the  
144 context of cells expressing both H3X and H3Y there could nonetheless exist a  
145 substantial fraction of inappropriate homodimeric interactions, which would complicate  
146 interpretation of downstream results. To quantitatively determine the extent of X/X or  
147 Y/Y homodimerization in vivo, a biotin-tagged (13) H3X or Y variant was coexpressed in  
148 combination with two other H3s: the same variant with a different epitope tag, and the

149 designed partner (**Figure 2**). To analyze H3-H3 interactions within individual  
150 nucleosomes and avoid contamination from adjacent nucleosomes (as could arise from  
151 undigested dinucleosomes), we treated extracts from these cells with dimethyl  
152 suberimidate (DMS), a crosslinking agent that produces well-characterized crosslinks  
153 within histone octamers (14, 15). Crosslinked samples were then digested with  
154 micrococcal nuclease to generate a soluble population of mononucleosomes. This was  
155 followed by biotin-based affinity purification in the presence of high salt (2M NaCl) to  
156 remove DNA and adjacent nucleosomes, leaving only crosslinked protein complexes  
157 that were subsequently analyzed by Western blotting. The DMS crosslinking efficiency  
158 of the X-Y heterodimeric pairs was nearly identical to that observed in cells expressing  
159 tagged H3 variants with a wild-type, homodimeric interface (**Figure 2 – Figure**  
160 **Supplement 1**).

161 Using this assay, we analyzed the extent of homodimerization of a lead H3X  
162 candidate using strains expressing Biotin-H3X, V5-H3X, and Myc-H3Y (**Figure 2A-C**).  
163 After streptavidin purification of biotin-H3X from DMS-crosslinked yeast, the species  
164 migrating at 31kD (red arrow, **Figure 2B**) is comprised of the captured biotin-H3X  
165 crosslinked to the other H3 from the same nucleosome. Myc-H3Y molecules were  
166 abundantly detected in the crosslinked 31kD species (**Figure 2B, Figure 2 – Figure**  
167 **Supplement 2**), consistent with the expected heterodimerization with H3X. In contrast,  
168 barely detectable levels of V5-H3X – which would result from H3X-H3X  
169 homodimerization – were observed in the bound 31kD species (**Figure 2B**, quantitated  
170 in **Figure 2C**). In a reciprocal experiment, we assayed H3Y homodimerization, again  
171 finding efficient heterodimerization in vivo along with barely detectable H3Y  
172 homodimerization (**Figure 2D-F, Figure 2 – Figure Supplement 2**).

173 In addition to its utility for genetic analysis of nucleosome symmetry, the ability to  
174 generate asymmetric nucleosomes in vitro would also provide a valuable resource for  
175 biochemical and structural studies. We therefore purified recombinant human histones  
176 H2A, H2B, and H4, as well as recombinant H3X and H3Y variants engineered onto the  
177 human H3 histone backbone. Gel filtration of in vitro assembled octamers revealed  
178 robust assembly of histone octamers assembled using wild-type H3, or assembled  
179 around the H3X/H3Y heterodimer pair. In contrast, attempts to refold histone octamers

180 using H3X only or H3Y only resulted in high molecular weight aggregates with no  
181 functional histone octamer (**Figure 3, Figure 3 – Figure Supplement 1A-B**). Moreover,  
182 H3X/H3Y-based octamers were readily reconstituted into nucleosomes when  
183 assembled with DNA, whereas the material obtained from H3X alone or H3Y alone did  
184 not assemble into nucleosomes.

185 In addition to the ability to generate asymmetric nucleosomes from recombinant  
186 proteins in vitro, chromatin purified from mutant yeast strains has also proven to be a  
187 powerful tool for in vitro chromatin studies (see, eg, (16)). We therefore affinity-purified  
188 chromatin from strains expressing an asymmetric H3X/H3Y pair in which one H3 carries  
189 a biotin tag, readily recovering the core histones regardless of whether the biotin tag  
190 was present on the X or Y variant (**Figure 3 – Figure Supplement 1C**). The engineered  
191 H3X/H3Y interface thus enables the convenient generation of asymmetric nucleosomes  
192 for biophysical and biochemical studies of nucleosomal symmetry in vitro.

193 Taken together, our genetic and biochemical analyses validate our designed  
194 obligate heterodimers, indicating that the great majority (average of ~97% as measured  
195 in **Figure 2C,F**) if not all of the nucleosomes in vivo are indeed heterodimeric. We have  
196 therefore established a unique system for manipulation of nucleosomal symmetry in  
197 vivo and in vitro. As with all studies based on expression of mutant histones, the mutant  
198 nucleosomes will be located throughout the yeast genome. Nonetheless, such studies  
199 have provided great insights into chromatin function over decades of study (12, 17),  
200 distinguishing between genes whose expression requires a given histone residue and  
201 those genes that are unaffected despite the loss of the residue (and its modification, if  
202 present).

203

### 204 **Genetic analysis of interactions between histone tail mutations**

205 The ability to generate asymmetric nucleosomes in vivo enabled us to quantitatively  
206 characterize interactions between mutations on the two histone tails using genetic  
207 epistasis. To this end, we generated “trios” of histone point mutants – asymmetric single  
208 mutations H3Xwt/H3Ymut and H3Xmut/H3Ywt, and the double mutation  
209 H3Xmut/H3Ymut. Importantly, although strains expressing the heterodimeric X/Y H3s  
210 exhibit reduced growth in YPD (doubling times of ~ 240 minutes at 30°C compared to

211 ~140 minutes for the parent strain, **Figure 4 – Figure Supplement 1A**) and a modest  
212 temperature-sensitive phenotype (robust growth at 34 C but failure to grow at 37 C –  
213 see below), any effects of the mutant X/Y interface on chromatin regulation and cellular  
214 function are internally controlled for in all studies by comparing all yeast carrying single  
215 or double histone mutations to the “pseudo-wild type” strain (H3Xwt/H3Ywt).

216 To broadly survey the landscape of inter-tail epistasis between histone  
217 mutations, we generated a set of 12 mutant trios, focusing on relatively well-  
218 characterized sites of post-translational covalent modifications. Mutant effects on  
219 organismal phenotypes are often context-dependent, and stress conditions can provide  
220 a sensitized environment for detection of chromatin-related phenotypes (18). We first  
221 assayed the relative fitness of these strains in both low (0.2 M) and high (0.8 M) KCl-  
222 containing media (**Figure 4A**), as the osmotic stress response is one of the most  
223 commonly studied transcriptional responses in budding yeast (19, 20). As expected,  
224 growth rates for strains carrying a single mutation on H3X were generally well-  
225 correlated with those for H3Y mutants, although a small subset of mutations exhibited  
226 different behavior on different H3 backbones (see, eg, H3K37Q in 0.8M KCl).

227 Consistent with the often-subtle phenotypes resulting from histone point  
228 mutations, the majority of mutations examined conferred no significant growth defects  
229 under either growth condition, or subtle growth effects such as the enhanced growth  
230 observed in all three H3K18Q strains growing in high salt. In contrast, we noted  
231 significantly diminished growth, particularly in high salt, for yeast carrying double  
232 H3K14R, H3K14Q, or H3K36Q mutations (**Figure 4B, Figure 4 – Figure Supplement**  
233 **1B**). Interestingly, the behaviors of the corresponding asymmetric single mutants were  
234 distinct: for H3K14R, single mutants already exhibited a partial growth defect that was  
235 exacerbated in the double mutant, while for H3K36Q the single mutant strains had no  
236 measurable deficit compared to the pseudo-wild type. These growth phenotypes  
237 correspond roughly to additive and recessive epistasis, respectively. Importantly, the  
238 stress sensitivity observed for these mutants was not specific to osmotic stress.  
239 Consistent with prior studies demonstrating that yeast lacking H3K36 methylation are  
240 hypersensitive to DNA damaging agents (21), we find that the K36Q double mutants –  
241 but neither of the single K36Q mutants – displayed increased sensitivity to both the

242 DNA alkylating agent methyl methanesulfonate (MMS) and the strand break-inducing  
243 agent phleomycin (**Figure 4C**). Moreover, these mutants were also temperature-  
244 sensitive, as symmetric double mutants exhibited reduced growth at 34 C, while the  
245 asymmetric mutants exhibited similar or only slightly reduced growth compared to the  
246 pseudo-wild type under these conditions (**Figure 4D, Figure 4 – Figure Supplement**  
247 **2**). We conclude that K36Q mutations confer sensitivity to osmotic, temperature and  
248 DNA damage stresses, but only when symmetrically present on nucleosomes. These  
249 data support the biochemical data indicating that we can separately manipulate single  
250 H3 molecules within nucleosomes in vivo, and provide an illustration of the types of  
251 biological regulation that can be discovered using these tools.

252

### 253 **A single H3K36 suffices to silence cryptic internal promoters**

254 Our growth data that a single copy of H3K36 per nucleosome is sufficient to support  
255 growth under stress conditions. What is the mechanistic basis for this function? In  
256 principle, mutation of this lysine could 1) affect biophysical properties of the nucleosome  
257 by eliminating a positive charge, 2) disrupt a binding site for regulatory protein that binds  
258 to the unmodified tail, or 3) disrupt (or mimic) a modification-dependent regulatory event  
259 (22). H3K36 is methylated by Set2 (23), with the resulting modified residues serving to  
260 activate the RPD3S histone deacetylase complex via binding of the Eaf3  
261 chromodomain-containing subunit (24-28). As the major biological role served by  
262 H3K36 methylation is silencing of cryptic internal promoters via activation of the RPD3S  
263 complex (24), and given that RPD3S can bind to nucleosomes with a single H3K36me3  
264 modification (29), we sought to test whether a single methylated H3K36 per nucleosome  
265 would be sufficient to support robust silencing of such cryptic transcripts in vivo.

266 We first explored this idea with genetic tests, comparing the growth phenotypes  
267 of a P38V mutant series to K36Q mutants. The P38V mutants enable di- and tri-  
268 methylation of H3K36 to be distinguished – the wild-type proline residue at this position  
269 undergoes regulated isomerization, and P38V mutations that eliminate the possibility of  
270 proline isomerization block trimethylation (30) but not dimethylation (31) of the nearby  
271 K36 residue, a finding that we confirm here (**Figure 4 – Figure Supplement 3**).

272 Importantly, cells expressing only H3P38V display none of the cryptic transcription

273 phenotypes observed in *set2*, *eaf3*, or H3K36Q mutants ((31) and see below), indicating  
274 that H3K36me2 is sufficient for the proper activation of the Rpd3S complex with regards  
275 to repression of cryptic transcription. Consistent with this, we find that double P38V  
276 mutations, on either a wild-type H3 backbone or in the context of the XY system, did not  
277 cause the temperature sensitivity observed in K36Q mutant cells (**Figure 4E, Figure 4 –**  
278 **Figure Supplement 2**). We therefore hypothesized that a single H3 N-terminal tail  
279 bearing K36 di- or trimethylation is sufficient to repress cryptic transcription.

280 To determine whether the single methylated K36 must be trimethylated or  
281 whether dimethylation is sufficient, we generated strains carrying the K36Q and P38V  
282 mutations in a trans conformation, that is, on opposite H3 N-termini (**Figure 4F**).  
283 Consistent with previous analyses of the effects of P38V (30, 31), immunoblotting  
284 confirms that these strains have one H3 tail (K36Q) that lacks K36 methylation entirely,  
285 and one tail (P38V) with a dimethylated K36 residue (**Figure 4 – Figure Supplement**  
286 **3**). We made strains with both possible configurations: H3XK36Q + H3YP38V and  
287 H3XP38V + H3YK36Q. Notably, neither of these K36Q/P38V trans strains are sensitive  
288 to growth at 34C (**Figure 4F**) or DNA damaging agents (**Figure 4C**). Thus, they  
289 phenotypically resemble the P38V double mutants and the single K36Q mutants, rather  
290 than the temperature-sensitive K36Q double mutants. These data indicate that a single  
291 K36me2 is sufficient to promote stress tolerance in budding yeast.

292 To determine whether the growth data reflect underlying defects in control of  
293 cryptic transcription, we carried out Northern blots against a canonical target of this  
294 pathway – *STE11* – which is host to a well-characterized cryptic promoter that is  
295 silenced in a K36- and RPD3S-dependent manner (24, 25, 26). First, we confirmed the  
296 expected increase in cryptic transcription in *eaf3Δ* mutants, and in yeast carrying  
297 symmetric H3K36Q mutations on the wild-type H3 backbone (**Figures 5A-B**, lanes 1-4,  
298 10). In addition, we confirm that H3K36me2 was sufficient to silence the *STE11* cryptic  
299 promoter, as H3P38V mutants (which lack H3K36me3 but exhibit normal H3K36me2  
300 levels) did not cause significantly increased cryptic transcription (lane 5).

301 Turning next to the question of whether one H3K36 is sufficient for silencing, we  
302 analyzed *STE11* RNAs in single and double H3K36Q mutants in the H3X/Y backbone  
303 (**Figure 5**, lanes 6-9). Consistent with the growth phenotypes observed in **Figure 4**, we



304 find that the pseudo-wildtype H3X/Y cells and the cells with a single K36Q mutated tail  
305 display similar, low levels of cryptic transcripts (lanes 6-8). In contrast, the cells with two  
306 K36Q mutated tails display greatly elevated cryptic transcript levels (lane 9). As  
307 expected, neither single nor double P38V mutant tails affected cryptic transcription in  
308 our strain background (lanes 14-16). Finally, P38V/K36Q trans strains (lanes 17-18)  
309 displayed modest derepression of cryptic transcription, more similar to that observed in  
310 single K36Q mutant cells (lanes 7-8) than the high level observed in K36Q double  
311 mutants (lane 9). We confirmed the generality of these findings using another well-  
312 studied model for cryptic transcription, the *FLO8* locus (32), where derepression of  
313 cryptic transcription was again observed specifically in the K36Q double mutant, but not  
314 in either K36Q single mutant (**Figure 5 – Figure Supplement 1**). We conclude that a  
315 single K36-di-methylated H3 tail per nucleosome is sufficient to restrain cryptic  
316 transcription in vivo.

317

### 318 **Interrogating histone crosstalk in cis and trans**

319 In addition to our ability to uncover effects of asymmetric mutant nucleosomes on  
320 transcriptional regulation, our system also provides a unique opportunity to determine  
321 whether histone “crosstalk” – the ability of one histone modification to alter the level of  
322 another modification via effects on modifying enzyme recruitment or activity (33) –  
323 occurs in cis (on the same histone), or in trans. We generated biotin-tagged H3  
324 molecules either carrying a point mutation of interest in cis, or carrying an otherwise  
325 wild-type sequence on the biotin-tagged H3, paired with a point mutation in trans  
326 (**Figure 6A**, cartoon). Biotin-tagged H3 molecules were then purified under stringent,  
327 partially denaturing conditions to facilitate the separation of H3X and H3Y, and the  
328 biotin-tagged H3 was subject to mass spectrometry to identify histone modifications  
329 present. Analysis of peptides derived from the engineered H3X/H3Y interface confirmed  
330 our ability to efficiently purify the biotin-tagged H3 molecule away from the untagged H3  
331 molecule from each nucleosome, with >93% purity observed for informative peptides  
332 analyzed (**Figure 6A**).

333 As cases of histone crosstalk that occur between different histones (e.g. effects  
334 of H2B ubiquitylation on H3 methylation levels) cannot be interrogated using our



335 system, we focused on H3S10, whose phosphorylation affects histone H3 lysine  
336 acetylation (34, 35). We found that the fraction of H3 molecules acetylated at K9 was  
337 lower in yeast strains carrying H3S10A symmetrically, either on a wild-type histone  
338 backbone or in the H3X/H3Y system. This decrease was observed by mass spec, and  
339 confirmed by quantitative Western blot (**Figures 6B and C**, left panel). Turning next to  
340 analysis of asymmetric mutant nucleosomes, mass spectrometric analyses showed that  
341 H3K9 acetylation levels were significantly decreased on the same histone tail carrying  
342 the S10A mutation, but were not affected by the presence of H3S10A in trans (**Figure**  
343 **6B**). Western blotting for H3K9ac in yeast strains where an epitope tag allows H3X and  
344 H3Y isoforms to be separated by gel electrophoresis confirmed our mass spec-based  
345 analysis of histone acetylation, with H3S10A affecting adjacent H3K9 acetylation on the  
346 same tail, but having no effect on modification of a paired wild-type H3 tail (**Figures 6C-**  
347 **F**).

348

349

350

## 351 **DISCUSSION**

352 Here, we demonstrate a novel system enabling genetically-encoded symmetry breaking  
353 for the histone octamer. Using protein engineering and directed evolution, we have  
354 designed and validated a pair of H3 variants – H3X and H3Y – that efficiently  
355 heterodimerize with one another in vivo, but which form extremely low levels (<3%) of  
356 homodimers. The ability to generate nucleosomes bearing either single mutations or  
357 symmetric double mutations to key regulatory residues will allow detailed mechanistic  
358 analyses of the roles for histone modifications in various aspects of chromosome  
359 biology. Here, we demonstrate two of many potential uses of this system, interrogating  
360 the role for H3K36 in control of cryptic transcription, and investigating “crosstalk”  
361 between histone modifications.

362

### 363 **Interpreting epistasis between the histone tails**

364 To genetically interrogate interactions between the histone tails, we analyzed  
365 phenotypes in yeast strains carrying one of four nucleosomes: H3Xwt/H3Ywt – “pseudo-

366 wild-type” – and H3X $\text{mut}$ /H3Y $\text{wt}$ , H3X $\text{wt}$ /H3Y $\text{mut}$ , and H3X $\text{mut}$ /H3Y $\text{mut}$ . In principle,  
367 we could expect to see a variety of classes of interactions between the mutations,  
368 including transgressive epistasis (not observed in this study), and a range from  
369 dominant epistasis, in which the single mutants exhibit the same phenotype observed in  
370 the double mutant, to recessive epistasis, in which a given phenotype is only observed  
371 in the double. For quantitative traits, these correspond to alleviating and aggravating  
372 epistasis, respectively (36).

373 Measured in the context of obligate heterodimers, such genetic interactions can  
374 provide insights into the mechanistic basis for readout of histone modifications. As a  
375 simple example, a protein that binds cooperatively to both tails of a given nucleosome  
376 should give rise to dominant epistasis between the histone mutations that affect its  
377 binding (depending of course on the concentration of the factor in question and its K $\text{d}$   
378 for a single tail), as loss of a single residue abrogates the cooperative binding.  
379 Conversely, if each histone tail recruits a binding protein independently of the other,  
380 then loss of a single tail could have a range of quantitative effects on local gene  
381 expression, depending on whether or not the binder is typically recruited in excess for  
382 some function. Downstream of initial binding interactions, many readouts of histone  
383 modification function, such as mRNA abundance, are several mechanistic steps  
384 removed from direct binding, and thus more complex models can readily be envisioned  
385 that would exhibit a range of distinct epistasis behaviors depending on the input/output  
386 relationships for the various intervening steps.

387 Here, we surveyed intra-tail epistasis for 12 sets of H3 point mutants, simply  
388 using growth rate as a phenotype. Even with this coarse resolution, we identified inter-  
389 tail interactions including dominant epistasis (for the enhanced low-salt growth seen in  
390 H3K18Q mutants, for example) to relatively unusual cases of recessive epistasis (for  
391 H3K36Q effects on growth in stress conditions). For followup studies we focused on  
392 H3K36Q, given that recessive epistasis makes more concrete mechanistic predictions,  
393 and given the well-understood role for H3K36 modification in gene regulation.

394

395 **A single H3K36me $\text{2}$  per nucleosome is sufficient for stress resistance and**  
396 **repression of cryptic transcripts**

397 Although H3K36 is potentially subject to multiple distinct modification pathways –  
398 H3K36 is acetylated at a small fraction of nucleosomes (37), for example – the majority  
399 of phenotypes of H3K36 mutants result from loss of H3K36 methylation-dependent  
400 activity of the RPD3S complex (24, 25, 26). Our system allowed us to ask, essentially,  
401 whether a single RPD3S binding site per nucleosome is sufficient to repress cryptic  
402 internal promoters.

403 Several lines of evidence demonstrate that a single H3K36me2 is sufficient for  
404 RPD3S silencing at cryptic promoters. First, we find that H3K36Q significantly affects  
405 growth rate – particularly under stress conditions – only when present in both H3 copies  
406 per nucleosome. Next, consistent with a primary function of H3K36 modification being to  
407 repress cryptic intragenic promoters, we show that a single wild-type K36 is sufficient to  
408 prevent transcription at such promoters. Third, extending prior studies, we find that  
409 growth rate and cryptic promoter silencing are both unaffected by double P38V mutants.  
410 P38V inhibits trimethylation but not dimethylation of K36 residues (31), and  
411 nucleosomes with two H3P38V tails are sufficient to prevent cryptic transcription either  
412 in natural, symmetric nucleosomes (31) or in our asymmetric nucleosomes (**Figure 5**,  
413 lane 16). Finally, the K36Q/P38V trans strains indicate that a single dimethylated K36  
414 residue is sufficient to prevent stress sensitivity (**Figure 4F**) and repress cryptic  
415 transcripts (**Figure 5**, lanes 17-18). Together, these data indicate that a single K36-  
416 dimethylated H3 tail per nucleosome is sufficient to prevent cryptic transcription, and to  
417 promote stress resistance.

418 Notably, the RPD3S complex appears to be particularly well-suited to carrying  
419 out its regulatory functions even on chromatin that is less than fully methylated at  
420 H3K36. In vitro experiments show that RPD3S is able to bind to nucleosomal templates  
421 containing asymmetric H3K36me3 modifications (29). Further, although RPD3S binds  
422 with higher affinity to dinucleosomes than monosomes, it binds with high affinity to  
423 templates with a dimethylated nucleosome adjacent to a fully unmethylated one. These  
424 data suggest that the methyl-K36/RPD3S system would be buffered against transient  
425 reductions in H3K36me2-3 density, for example during DNA repair or replication-  
426 mediated loss of modified histones. Our data extend these observations to indicate that

427 the enzyme can function effectively in vivo even if it can only engage a single  
428 H3K36me2 or me3 per nucleosome.

429

### 430 **H3S10 mutants affect H3K9 acetylation in cis**

431 As another demonstration of the utility of the H3X/H3Y system, we carried out mass  
432 spectrometry analysis of a histone “crosstalk” pathway. Here, we take advantage of  
433 biotin-based purification to stringently separate a biotin-tagged H3X from an untagged  
434 H3Y (and vice versa) prior to mass spectrometry analysis. This method allows probing  
435 of histone crosstalk pathways in which one modification affects a second modification  
436 site. We show that H3S10A mutations decrease acetylation at the neighboring K9  
437 residue, but only on the molecule in cis. This is consistent with a recent in vitro study  
438 demonstrating that S10 phosphorylation stimulates H3 tail acetylation by Gcn5 only in  
439 cis (35). This example provides a clear example of how asymmetric nucleosomes can  
440 be used for detecting modification dependency relationships.

441

### 442 **Potential applications**

443 In addition to the two proof-of-concept analyses described above, we anticipate that the  
444 H3X/Y scaffold will provide a powerful tool for many additional studies, and we list a few  
445 potential applications here. First, we show here that the H3X/Y system assembles  
446 appropriately in vitro (**Figure 3**), providing a convenient method for generation of  
447 asymmetric nucleosomes for in vitro studies. This method should prove more  
448 generalizable than existing methods that rely on immunopurification (3, 7) or extensive  
449 chemical synthesis (38). Such asymmetric nucleosomes could be used to generate  
450 single-tailed nucleosomes for structural studies of tail-dependent nucleosome-binding  
451 proteins, significantly reducing the conformational heterogeneity resulting from the many  
452 flexible, unstructured histone tails. Nucleosomes carrying either asymmetric point  
453 mutations or asymmetric modified residues (generated using peptide ligation, for  
454 example – (39)) will facilitate detailed biochemical analyses of chromatin regulators, or  
455 selection of asymmetry-specific binding partners. Such studies can also be envisioned  
456 using asymmetric nucleosomes purified from living cells – thus occupying a wide range

457 of DNA sequences and carrying a multitude of covalent modifications – as affinity-  
458 tagged X and Y halves of the heterodimer allow for efficient and rapid purification of  
459 chromatin composed of asymmetric nucleosomes (**Figure 3 – Figure Supplement 1C**).

460 In addition to improving on extant methods to generate asymmetric nucleosomes  
461 in vitro, our system uniquely allows genetically-encoded assembly of asymmetric  
462 nucleosomes across the genome in living cells. We describe here one example of in  
463 vivo analysis of the gene regulatory consequences resulting from single vs. double H3  
464 mutations for H3K36Q, which can of course be extended to additional H3 mutations and  
465 to genome-wide or single-cell analyses. Although such studies are demonstrated here  
466 using the budding yeast system, the H3-H3 interface is generally highly conserved  
467 throughout evolution, and we expect that this system should function appropriately in  
468 other species – indeed, the biochemical reconstitution of asymmetric nucleosomes  
469 described in **Figure 3** is carried out using human histone sequences. Although  
470 canonical histone genes are often encoded in many copies in large multi-gene genomic  
471 clusters and are therefore inconvenient for genetic studies, a *Drosophila* model has  
472 been developed in which the histone genes have been relocated to an artificial locus  
473 (40). Along with *S. pombe*, these models should enable analysis of H3K9/HP1 and  
474 H3K27/Polycomb repression systems in vivo. In addition, even in other model  
475 organisms we expect that low copy number H3 molecules such as H3.3 and CENP-A  
476 should prove amenable to analysis using the H3X/Y system.

477 In any of these systems, the X/Y heterodimer will not just allow analysis of single  
478 vs. double mutations of the same residue, but will also enable cis and trans dissection  
479 of effects of combinatorial mutations (eg H3XK9R/H3YK14R vs.  
480 H3XK9RK14R/H3YWT). Fusing individual H3 molecules to labeling reagents such as  
481 BirA or Dam, or introduction of cysteine residues that can be used to create local nicks  
482 in the DNA, could potentially also be used to probe stereospecificity – facing from the  
483 promoter into a coding region, does a given nucleosome remodeler bind the left or the  
484 right H3 tail? – of nucleosome binding proteins. It is also possible to envision pulse-  
485 chase methods for investigation of H3/H4 dimer mixing during replication and  
486 replication-independent nucleosome replacement.

487 Together, our data describe a versatile system for investigation of nucleosome  
488 symmetry, and demonstrate the utility of in vivo analysis of asymmetric nucleosomes as  
489 a mechanistic probe for histone modification function.

490

491

492

## 493 **ACKNOWLEDGEMENTS**

494 We thank members of the Rando and Kaufman labs for discussions and critical reading  
495 of the manuscript. This work was supported by NIH grant R01GM100164 (OJR and  
496 PDK), ERC Grant 340712 (NF), and the ISF I-Core on Chromatin and RNA in Gene  
497 Regulation (NF). Proteomics experiments were supported by NIH grants P30CA060553  
498 and P41GM108569. AA is grateful to the Azrieli foundation for the award of an Azrieli  
499 Fellowship.

500

501

502

## 503 **MATERIALS AND METHODS**

504 **Plasmid Constructions and mutagenesis.** C-terminal mutations of *HHT2*, one of the  
505 yeast genes encoding histone H3, were generated according to QuickChange Site-  
506 Directed Mutagenesis protocol (Stratagene). Plasmids containing Myc- or Flag-tagged  
507 *HHT2* were described previously (41). The insertion of the V5 or biotin acceptor tags at  
508 the 5' end of *HHT2* was generated by PCR. The DNA fragment containing the *E. coli*  
509 *BirA* gene (encoding biotin-protein ligase) (13) was cloned into a *HIS3*-marked  
510 integration vector downstream of the yeast *GPD* promoter and upstream of *PGK*  
511 terminator, and integrated into the *his3* locus of strain PKY4171.

512

513 **Yeast strains and growth.** Yeast growth and plasmid transformation of yeast cells  
514 were done according to standard yeast protocols. For plate assays, strains were grown  
515 overnight in 2 ml YPD medium at 30°C, five-fold dilutions (starting from OD<sub>600</sub>=0.6) were  
516 spotted on YPD-agar plates (with added compounds such as MMS when indicated),  
517 and incubated at indicated temperatures for 3-4 days. Analyses of osmotic stress

518 sensitivity (**Figure 4, Figure 4 – Figure Supplement 1B**) were performed in robotically-  
519 manipulated cultures grown in 96-well plates – the growth rates in these experiments  
520 are internally consistent but distinct from growth measurements obtained in well-aerated  
521 liquid cultures (**Figure 4 – Figure Supplement 1A**).

522 Low-copy plasmids containing mutated histone genes were introduced by LiOAc  
523 transformation, and then 5-FOA was used as a counterselecting agent to select against  
524 the *URA3* plasmid containing the wild-type *HHT1-HHF1* genes. All yeast strains (listed  
525 in **Table S1**) were derived from histone H3/H4 “shuffle” strain MSY421 from M. Smith  
526 and C.D. Allis (42), which has both chromosomal H3/H4-encoding loci deleted.

527

528 Genetic screens for asymmetric mutants were carried out in:

529 PKY4171

530 MATa;  $\Delta(hht-hhf1)$ ;  $\Delta(hht2-hhf2)$ ; *leu2-3,112*; *ura3-62*; *trp1*; *his3*; *bar1::hisG*

531 + p(*HHT1-HHF1*, *URA3*, CEN)

532

533 DMS crosslinking studies:

534 PKY4171 derivatives with (*HHT1-HHF1*, *URA3*) plasmid replaced with:

535

536 PKY4625

537 + P22 (Myc-H3Y = Myc-hht2(L109I, A110W, L130I), HHF2, LEU2)

538 + P67 (bio-H3X-126A = biotin-hht2(L126A, L130V), HHF2, TRP1)

539 + P72 (V5-H3X-126A = V5-hht2(L126A, L130V), HHF2, URA3)

540

541 PKY4626

542 + P22 (Myc-H3Y = Myc-hht2(L109I, A110W, L130I), HHF2, LEU2)

543 + P71 (bio-H3X-130A = biotin-hht2(L126V, L130A), HHF2, TRP1)

544 + P73 (V5-H3X-130A = V5-hht2(L126V, L130A), HHF2, URA3)

545

546 PKY4694

547 + P54 (biotin-H3Y = biotin-hht2(L109I, A110W, L130I), HHF2, LEU2)

548 + P72 (V5-126A = V5-hht2(L126A, L130V), HHF2, URA3)



549 + P35 (Myc-H3Y = Myc-hht2(L109I, A110W, L130I), HHF2, TRP1)

550

551 PKY4695

552 + P54 (biotin-H3Y = biotin-hht2(L109I, A110W, L130I), HHF2, LEU2)

553 + P73 (V5-130A = V5-hht2(L126V, L130A), HHF2, URA3)

554 + P35 (Myc-H3Y = Myc-hht2(L109I, A110W, L130I), HHF2, TRP1)

555

556 Mass spectrometry samples were grown in derivatives of

557 PKY4574 = PKY4171 with P65 (BirA::HIS3 integration plasmid) inserted.

558

559 **Directed evolution of improved H3X alleles.** Plasmid P46 (*hht2*-(L126V, L130V),  
560 *HHF2*, *TRP1*) was used as the template to generate four PCR-generated libraries, each  
561 with randomized nucleotides at one of four H3 codons (109, 110, 126, 130). The full  
562 length PCR product was gel purified, self-ligated with T4 DNA ligase and transformed  
563 into competent *E. coli* Top10F' cells. 1 ml LB was added after heat shock transformation  
564 and the cells recovered for 1.5 h at 37°C. 100 µl cells were plated to check the colony  
565 number, and the rest of the transformation was put into culture tube with another 2 ml  
566 LB and antibiotic to grow O/N before plasmid DNA miniprep (Zymo). The randomization  
567 of the desired codon in the four libraries of *hht2* was confirmed by sequencing (**Figure 1**  
568 **– Figure Supplement 1B**).

569 The four libraries were each transformed separately into yeast strain PKY4171,  
570 which carries the plasmid-borne wild-type H3 (*URA3*). 153 transformants were picked  
571 for each library and patched onto both SD-Trp-Ura and FOA plates at the same time. A  
572 subset of isolates was found inviable after incubation at 30°C for 10 days on FOA,  
573 indicating inability to grow the absence of wild type H3. These isolates were therefore  
574 chosen for the second step. For each library separately, cells from each FOA-sensitive  
575 isolate were pooled into 25 ml of SD media, grown to an A600 of ~0.5 and transformed  
576 with plasmid P44 (H3Y, H4, *LEU2*) and plated on SD-Trp-Leu. These transformants  
577 were then replica-plated onto FOA media. Plasmids from resulting FOA-resistant  
578 colonies were analyzed by colony PCR and sequencing. Candidate plasmids were  
579 retested by retransformation into PKY4171 with or without P44. The plasmids that

580 conferred robust growth on FOA media in the presence of P44 and no detectable  
581 growth in its absence encoded the *hht2* variants termed 126A (carrying mutations 126A,  
582 130V), 130A (126V, 130A), 130T (126V, 130T), 130Q (126V, 130Q).

583

#### 584 **Effects of the “pseudo-wild type” H3X/H3Y interface on yeast growth**

585 As asymmetric nucleosomes cannot be made on a wild-type H3 backbone, all  
586 experiments by necessity involve comparisons to pseudo-wild type yeast carrying the  
587 H3X/H3Y pair. Pseudo-wild type yeast are viable, but grow slowly relative to the  
588 parental strain in YPD at 30°C (**Figure 4 – Figure Supplement 1A**). In addition, they  
589 are temperature-sensitive and grow extremely poorly at 37°C. For this reason,  
590 temperature sensitivity in this system is assayed at 34°C (**Figure 4D-F, Figure 4 –**  
591 **Figure Supplement 2**). Importantly, the temperature-sensitivity phenotypes observed at  
592 this temperature occur in the same sets of mutants that grow poorly in high salt or in the  
593 presence of DNA-damaging agents (**Figure 4**). Thus, although the X/Y histone interface  
594 provides a sensitized assay for some phenotypes, it nevertheless represents a useful  
595 and internally-consistent platform for exploring important and physiologically-relevant  
596 aspects of gene regulation.

597

#### 598 **Dimethyl suberimidate-crosslinked nucleosomes.**

599 100 ml cell cultures were grown in synthetic dextrose media to maintain selection for the  
600 three histone-encoding plasmids, with 250 nM biotin added to favor biotinylation of the  
601 tagged H3. Cells were harvested in early log phase (A600 ~0.25), pelleted and  
602 transferred to 1.5 ml O-ring microcentrifuge tubes (Fisher #02-707-353). Cells were  
603 washed three times with 1 ml extraction (E) buffer (20 mM Na borate, pH 9.0, 0.35 M  
604 NaCl, 2 mM EDTA, plus 1 mM PMSF added freshly). Cells were resuspended in 900 µl  
605 E buffer, and 0.5 ml glass beads (0.5 mm, Biospec) were added to each tube. Cell walls  
606 were mechanically broken with three one-minute pulses in a Biospec beadbeater, with  
607 five-minute incubations on ice between pulses. The tube bottoms were punctured with a  
608 flame-heated 26 gauge needle, placed into a 12 x 75 mm plastic tube and centrifuged  
609 for 2 min at 1500 rpm in a tabletop clinical centrifuge at 4°C. The liquid extracts were  
610 resuspended and transferred to 1.5 ml microfuge tubes. 1/10 volume freshly dissolved

611 11 mg/ml dimethyl suberimidate (Pierce) in E buffer was added, and samples were  
612 incubated with rotation at room temperature 90 minutes. For time point aliquots to be  
613 analyzed directly on gels, proteins were precipitated by addition of 1/10 volume 100%  
614 TCA. For material to be MNase-digested and immunoprecipitated, the crosslinker was  
615 quenched by addition of 50 mM Tris-Cl, pH 7.5 and further rotation for 15 min. 10 mM  
616  $MgCl_2$  and 1 mM  $CaCl_2$  were added and tubes were equilibrated at 37°C for 5 minutes.  
617 20  $\mu$ l MNase (Worthington, 20 U/ $\mu$ l in 10 mM Tris-Cl pH 7.4) were added, tubes were  
618 inverted five times and incubated at 37°C, 20 min. Digestion was stopped by moving  
619 tubes to 4°C, adding 40  $\mu$ l 0.25 M EDTA/EGTA and inversion to mix. Material was  
620 centrifuged at 8000 x g for 1 min, 4°C, and pre-cleared by incubation with CL2B-  
621 sepharose beads for 30 min 4°C and centrifugation at 8000 x g for 1 min, 4°C. The  
622 supernatant was the input for the pulldown assays. 30  $\mu$ l of a 50% slurry of streptavidin-  
623 agarose beads was added to each tube, followed by rotation for 2 hours at 4°C.  
624 Samples were then centrifuged at 8000 x g for 1 min, 4°C and the beads were washed  
625 three times w/ 1 ml TE + 2 M NaCl + 0.2% Tween20, rotating at 4°C for 5 min each  
626 time. After the last wash all supernatant was removed and beads were resuspended in  
627 protein gel sample buffer. Proteins were separated on 17% SDS-PAGE gels and  
628 analyzed by immunoblotting; the 31kD H3-H3 crosslinked species was quantified on a  
629 BioRad Chemidoc system.

630

### 631 **Expression and purification of recombinant histones**

632 Yeast heterodimer 'X' (L126A, L130V) and 'Y' mutations (L109I, A110W, L131I) were  
633 introduced into codon-optimized human histone H3 sequences lacking cysteines. This  
634 yielded human heterodimer 'X' with the following point mutations: C96S, C110A, L126A,  
635 and I130V; and human heterodimer 'Y': C96S, L109I, C110W (human histone H3  
636 already has I131).

637 All wild-type and mutant human histone H3 proteins were purified according to  
638 the rapid purification protocol previously described (43), with slight modifications.  
639 Specifically, codon optimised histone H3 (supplied by Entelechon – now Eurofins) was  
640 expressed from a pETM13 vector, transformed into the E. coli strain Rosetta (DE3)  
641 pLysS (Novagen). Bacteria were grown in LB medium (with 50  $\mu$ g ml<sup>-1</sup> kanamycin and

642 25 µg ml<sup>-1</sup> chloramphenicol) at 37 °C. Protein expression was induced with 0.25 mM  
643 IPTG (OD<sub>600</sub> = 0.6) and cells were harvested after 4 h by centrifugation. Cell pellets  
644 were resuspended in cold lysis buffer (7 M urea, 20 mM sodium acetate (pH 5.2), 200  
645 mM NaCl, 1 mM EDTA and 5 mM β-mercaptoethanol) and cells lysed by sonication.  
646 The lysate was clarified by centrifugation at 75,600g for 20 minutes and the supernatant  
647 filtered using a 0.45 µm syringe filter (HPF Millex, Millipore). The sample was injected  
648 onto connected HiTrap Q HP (5 ml) and HiTrap SP HP (5 ml) columns (GE Healthcare)  
649 pre-equilibrated in lysis buffer. Columns were washed with lysis buffer before removing  
650 the HiTrap Q column. Histone H3 was eluted from the HiTrap SP column with a 12 CV  
651 gradient into 60% elution buffer (lysis buffer with 1 M NaCl). Fractions containing  
652 histone H3 were pooled, concentrated and dialysed into 1 mM DTT. Finally, the  
653 histones were aliquoted and lyophilised for storage.

654 Human histone H4 (kindly provided by T.Bartke) and the H2A/H2B dimer were  
655 purified as previously described (44).

656

### 657 **Nucleosome reconstitution**

658 Purified histones were used to attempt the assembly of histone octamers, as previously  
659 described (44). Briefly, histones dissolved in unfolding buffer (20 mM Tris (pH 7.5), 6 M  
660 guanidine hydrochloride, and 20 mM DTT) were mixed in equimolar ratios and diluted to  
661 a final concentration of 1 mg ml<sup>-1</sup>. The histones were extensively dialysed against  
662 refolding buffer (10 mM Tris (pH 7.5), 2 M NaCl, 1 mM EDTA and 5 mM β-  
663 mercaptoethanol) before being concentrated and purified by size exclusion  
664 chromatography (Superdex 200 Increase 3.2/300 column; GE Healthcare). Pooled  
665 fractions were concentrated and combined with 167 bp Widom DNA at an equimolar  
666 concentration, with the aim of reconstituting nucleosomes by salt deposition (45) using  
667 buffers containing 20 mM Tris (pH 7.5), 5 mM β-mercaptoethanol, 1 mM EDTA, and the  
668 following NaCl concentrations: 2 M, 850 mM, 650 mM and 150 mM. Following dialysis,  
669 the samples were centrifuged at 20,000g to remove any precipitate before nucleosome  
670 assembly was assessed by native PAGE (5 % polyacrylamide, 3% glycerol, 0.5 X TAE;  
671 100 V for ~1.5 h at 4 °C).

672

673 **Mass spectrometric analysis of biotinylated H3 from asymmetric nucleosomes.**

674 1000 ml cultures were grown in YPD + 250 nM biotin at 30°C to mid-late log phase  
675 (A600 = 0.4-0.7). Then, sodium azide and phenylmethylsulfonyl fluoride were added to  
676 the medium at final concentrations of 0.1% and 5 mM, respectively. Cells were pelleted  
677 and collected into two to four O-ring tubes as above, and washed twice with buffer TG  
678 (0.1 M Tris-Cl, pH 8.0, 20% glycerol) + protease/deacetylase/phosphatase inhibitors: 1  
679 mM PMSF, 0.5 µg/ml leupeptin, 0.7 µg/ml pepstatin, 1.0 µg/ml E64, 1.0 µg/ml aprotinin,  
680 1 mM benzamidine) + 20 mM Na butyrate, 2 mM nicotinamide, 1 mM EDTA, 1 mM  
681 Na3VO4. Tubes were frozen in liquid nitrogen and stored at -80C. All subsequent steps  
682 were on ice or at 4°C.

683 Each tube of frozen cells was resuspended in 900 µl TG buffer with the inhibitors  
684 described above, plus 0.5 ml glass beads (0.5 mm, Biospec). Cell walls were broken by  
685 bead beating, and beads were removed as described above. Liquid extracts were  
686 transferred to 1.5 ml eppendorf tubes, and centrifuged 7K rpm, 5 min (4.5K x g). The  
687 cytosolic supernatant was removed and the pellet was resuspended in 1 ml Buffer L (50  
688 mM Hepes-KOH pH 7.5, 140 mM NaCl, 1 mM EDTA, 1% Triton X-100, 0.1% sodium  
689 deoxycholate) + inhibitors as described above. Chromatin was sheared in a Bioruptor  
690 (Diagenode) for 30 min (2 x 15 minute rounds of 30" on/30" off on "High" power;  
691 samples were chilled on ice 10 minutes between rounds). Extracts were transferred to  
692 microfuge tubes, centrifuged at 6K rpm (= 3.3K x g) for 10 min. The supernatant was the  
693 input for the pulldown assays. 30 µl of a 50% slurry streptavidin-agarose beads was  
694 added to each tube, followed by rotation for 2 hours at 4°C. (Beads were pre-  
695 equilibrated and blocked in Buffer L + inhibitors + 10 µg insulin per sample.) Samples  
696 were centrifuged at 8000 x g for 1 min, and the beads were washed three times with 1  
697 ml TE + 2 M NaCl + 2 M urea, rotating at 4°C for 5 min each time. To remove salt for  
698 mass spectrometry, beads were washed three times with water, snap-frozen and stored  
699 at -80°C.

700

701 **On-bead histone propionylation and tryptic digestion.** Biotin-tagged histone H3

702 bound to streptavidin beads were washed twice with 300µl of 100mM ammonium

703 bicarbonate. For in vitro propionylation of histone H3, 300µl of a 3:1

704 isopropanol:propionic anhydride mixture was added followed by ammonium hydroxide  
705 to adjust pH to ~8. The beads were incubated at 51°C for 20 min. Beads were then  
706 collected by centrifugation at 1000 rpm for 60 s and washed with ammonium  
707 bicarbonate before a second round of propionic anhydride treatment. The washed  
708 beads were resuspended in 50mM ammonium bicarbonate and incubated with 2µg of  
709 Promega sequencing grade trypsin overnight at 37°C. The digest was then derivatized  
710 with propionic anhydride using the same protocol as described above. Histone peptides  
711 were extracted from the beads with 200 µl of 50% acetonitrile in water. Peptides were  
712 completely dried in a SpeedVac concentrator and then resuspended in 0.1%  
713 trifluoroacetic acid for MS analysis.

714

715 **Liquid chromatography single reaction monitoring mass spectrometry (LC-SRM-**  
716 **MS).** Histone peptides were injected in triplicate onto a TSQ Quantum mass  
717 spectrometer (ThermoFisher Scientific) directly linked to a Dionex nano-LC system.  
718 Peptides were first loaded onto a trapping column (3 cm × 150 µm) and then separated  
719 with an analytical capillary column (10 cm × 75 µm). Both were packed with ProntoSIL  
720 C18-AQ, 3µm, 200Å resin (New Objective). The chromatography gradient was achieved  
721 by increasing percentage of buffer B from 0 to 35% at a flow rate of 0.30 µl/min over 45  
722 min. Solvent A: 0.1% formic acid in water, and B: 0.1% formic acid in 95% acetonitrile.  
723 The peptides were then introduced into the MS by electrospray from an emitter with 10  
724 µm tip (New Objective) as they were eluted from analytical column. The instrument  
725 settings were as follows: collision gas pressure of 1.5 mTorr; Q1 peak width of 0.7  
726 (FWHM); cycle time of 3 s; skimmer offset of 10 V; electrospray voltage of 2.5 kV.  
727 Targeted analysis of unmodified and various modified histone peptides were performed.

728 Raw MS files were imported and analyzed in Skyline with Savitzky-Golay  
729 smoothing (46). All Skyline peak area assignments were manually confirmed. Total  
730 peak areas normalized to a non-modified H3 peptide were used to plot bar graphs  
731 representing relative proportions of distinct histone modifications. The relative  
732 abundances were determined from the mean of three technical replicates with error  
733 bars showing standard deviation.

734



### 735 **Affinity purification of salt-washed chromatin**

736 These preparations were performed as described above for the mass spectrometry  
737 samples with the following modifications. 100 ml cultures were grown to late log phase  
738 ( $OD_{600} = 1$  to 3) in YPD + 250 nM biotin and cells were immediately subjected to bead  
739 beating. After removal of the cytosolic supernatant, pellets were washed three times  
740 with 1.0 ml Wash Buffer (10 mM Tris-Cl, pH 8.0, 1 mM EDTA, 0.1 % Triton X-100, 0.5 M  
741 NaCl + protease inhibitors/PTM inhibitors as described above), spinning at 4.5K x g for  
742 5 minutes at each step. The washed chromatin resuspended in 1.0 ml Wash Buffer and  
743 sheared in a Bioruptor as described above. The soluble chromatin was fractionated  
744 using streptavidin-agarose as described above, except that the washes were performed  
745 three times with 1.0 ml Wash Buffer. Bound material from each preparation was  
746 resuspended in 50  $\mu$ l SDS-PAGE gel sample buffer.

747

### 748 **Northern Blot Analysis**

749 Cells were grown in YPD medium to mid-exponential phase ( $OD_{600} = 0.4$  to 0.7), and  
750 collected by filtration. RNA was prepared by a hot phenol method (47). Northern blot  
751 analysis was performed as described previously (48) with following modifications:  
752 *STE11* and *FLO8* PCR fragments (49) were used as probes that were labeled with  
753 alkaline phosphatase using Amersham AlkPhos Direct Labeling and Detection Systems  
754 (GE healthcare). Blots were exposed to HyBlot CL Autoradiography Film (Denville  
755 Scientific). Signal intensity was quantified by using ImageJ.

756

757 Primers for Northern probe (49):

758 o-STE11-11: GAA GGA GTT ACA TCA TGA GAA CAT TGT TAC

759 o-STE11-12: GTG TGC ATC CAG CCA TGG ATG CTG CAG CAA

760 o-FLO8-13: GAC GCT CAG AAG CAA AGA AGT TCT AAG GTA

761 o-FLO8-14: CTC AAC ACG TGA CTT CAG CCT TCC CAA TTA

762

### 763 **FIGURE LEGENDS**

764 **Figure 1: Design and testing of asymmetric nucleosomes.**



765 A) Schematic of asymmetric histone H3 design. Left: Wild-type H3/H4 tetramers are  
766 symmetrical, with H3-H3 interactions serving as the dimerization interface. The H3 N-  
767 terminus, site of many modifiable residues, is indicated protruding from the globular  
768 domain. Right: Obligate heterodimer H3s are comprised of distinct “X” and “Y”  
769 interaction partners which are altered to prevent either H3 from homodimerizing.

770 B) Computational models of the designed histone H3 heterodimer. (1) The four-helix  
771 bundle comprising the H3-H3 C-terminal dimerization interface (pdb 1kx3). Leucine and  
772 alanine residues at the hydrophobic interface are indicated. (2) The designed  
773 asymmetric mutations pack efficiently as a heterodimer, with partners colored in green  
774 (H3Y) and yellow (H3X). Indicated residues at the H3-H3 interface were engineered to  
775 form a bump-hole interface to increase interaction affinity. (3-4) Altered H3s are  
776 designed not to homodimerize due to van der Waals clashes (3) or voids (4) in the  
777 hydrophobic core.

778 C-D) Genetic analysis of heterodimeric H3X/H3Y pairs.

779 C) H3Y alone cannot support growth. Images show growth of yeast carrying wild-type  
780 H3 on a *URA3*-marked plasmid as well as either empty plasmid, wild-type H3, H3Y  
781 alone, or both H3X and H3Y. Three independent transformants for each strain were  
782 grown on 5-FOA to select against the *URA3* shuffle plasmid.

783 D) H3X alone cannot support growth. Left panels: growth of three independent  
784 transformants of various H3X strains (evolved second-generation mutations indicated at  
785 left) in the absence of H3Y. Bottom: positive control with a *TRP1*-marked wild-type  
786 histone plasmid. Right panels: growth of indicated H3X strains in the presence of H3Y.  
787 Synthetic complete (SC) plates were grown 3 days, FOA plates 9 days. No growth on  
788 FOA was observed for any of the four evolved H3X alleles in the absence of H3Y, even  
789 after extended incubation.

790 E) Sequences of final H3X-H3Y molecules. All four H3X variants have been validated  
791 genetically, while two variants – 126A/130V and 126V/130A – have been validated  
792 biochemically (see **Figure 2** and not shown). 126A is used for all functional analyses.

793

794 **Figure 2: Biochemical analysis of asymmetric nucleosome formation in vivo.**

795 A) Schematic for in vivo biochemical analysis of H3X dimerization. Yeast strains  
796 expressed biotin-tagged H3X along with tagged H3X and H3Y, as indicated.  
797 B) Immunoblot analysis of biotin-H3X partners. For each of the indicated antibodies  
798 (Myc or V5, the same blot was probed sequentially), the left two lanes show total DMS-  
799 crosslinked, MNase-digested chromatin (Input), and right lanes show streptavidin-  
800 precipitated biotinylated-H3 (Bound). Arrow indicates the expected size (31 kD) of  
801 crosslinked H3-H3 dimer species – note that biotin-H3 molecules crosslinked to H4  
802 would not be recognized by the anti-epitope antibodies used for Western blot analysis.  
803 Asterisk indicates monomeric H3 molecules – presence of V5-tagged H3X (left panel) at  
804 this position in the bound fraction reflects bead contamination by uncrosslinked H3  
805 molecules. Full gel, including unbound material and DMS control, is shown in **Figure 2**  
806 **– Figure Supplement 2.**  
807 C) Quantitation of the amounts of the crosslinked 31kD H3-H3 dimers precipitated with  
808 streptavidin-agarose for second-generation H3X variant 126A. The mean and standard  
809 deviation for 3 independent replicate experiments are shown.  
810 D-F) As in (A-C), but for biotin-tagged H3Y. As above, the homodimer signal (Myc, right  
811 panel) at 31kD in the bound material was almost undetectable, while V5-tagged  
812 H3X/H3Y heterodimers were readily detected. The mean and standard deviation for 3  
813 independent replicate experiments are quantitated in panel (F).

814

815 **Figure 3: Human histone H3 mutants ‘X’ and ‘Y’ form obligate heterodimers in**  
816 **vitro.**

817 A) Size exclusion (Superdex 200 Increase 3.2/300) gel filtration profiles showing the  
818 purification of octamer refolding reactions containing wild-type and heterodimer ‘X’ and  
819 ‘Y’ histone H3. Octamer refolding in the presence of both ‘X’ and ‘Y’ H3 yields histone  
820 octamers with a characteristic elution profile, similar to refolding reactions containing  
821 wild-type H3, while reconstitutions with only H3X or only H3Y form aggregates.  
822 B) Native PAGE analysis of nucleosome reconstitution experiments with purified  
823 histones from (A). H3X/Y octamer reconstitutions readily form nucleosomes when  
824 assembled onto DNA, while the aggregates formed in octamer refolding reactions

825 containing either 'X' or 'Y' alone do not form histone octamers and therefore cannot  
826 form nucleosomes in vitro.

827

#### 828 **Figure 4: Genetic epistasis between the H3 tails.**

829 (A-B) We constructed 12 sets of point mutations in histone H3, with each mutant cycle  
830 including H3Xmut/H3Ywt, H3Xwt/H3Ymut, and H3Xmut/H3Ymut – for each mutant  
831 trio, X/Y/double mutations are ordered from left to right, as indicated with  
832 green/yellow/blue boxes in Panel (B). For all 12 trios, as well as the matched “pseudo-  
833 wt” (labeled as **pWT**) carrying H3Xwt/H3Ywt (leftmost bar and dashed line), we  
834 measured doubling times in at least 6 replicate cultures in low (A) and high (B) KCl.  
835 Boxes emphasize H3K14R and H3K36Q trios, as detailed in text. Note that growth rates  
836 here were measured robotically in a 96-well format, so doubling times are slower than  
837 those typically measured in well-aerated cultures (**Figure 4 – Figure Supplement 1A**).

838 (C) Effects of H3K36Q mutants on DNA damage sensitivity. Serial dilutions of the  
839 indicated strains were plated on YPD, YPD + 10 ng/ml phleomycin or YPD + 0.025%  
840 MMS, as indicated. pWT XY (PKY4704), K36Q mXY (PKY4829), K36Q XmY  
841 (PKY4831), K36Q mXmY (PKY4834), K36Q\_X/P38V\_Y (PKY5138), and  
842 P38V\_X/K36Q\_Y (PKY5140).

843 D-F) Serial dilution growth assay for the indicated strains incubated at 30 C or 34 C, as  
844 indicated. Note that yeast carrying pseudo-wild type H3X/H3Y nucleosomes grow poorly  
845 at 37C, so we assayed temperature sensitivity at 34 C. Mutant set in (D) shows  
846 temperature-sensitivity is specific to symmetric H3K36Q mutant. Mutant set in (E)  
847 shows that complete loss of H3K36me3 in the symmetric H3P38V mutant (where  
848 H3K36me3 is replaced with H3K36me2) is compatible with rapid growth at high  
849 temperatures. Mutant set in (F) shows that a single dimethylated K36 residue per  
850 nucleosome is compatible with rapid growth at high temperatures.

851

852 Strains analyzed were: pWT XY (PKY4704), R2K mXY (PKY4749), R2K XmY  
853 (PKY4751), R2K mXmY (PKY4753), K9Q mXY (PKY4714), K9Q XmY (PKY4715), K9Q  
854 mXmY (PKY4706), K9R mXY (PKY4773), K9R XmY (PKY4775), K9R mXmY  
855 (PKY4777), S10A mXY (PKY4716), S10A XmY (PKY4717), S10A mXmY (PKY4707),  
856 K14Q mXY (PKY4789), K14Q XmY (PKY4791), K14Q mXmY (PKY4793), K14R mXY  
857 (PKY4781), K14R XmY (PKY4783), K14R mXmY (PKY4786), K18Q mXY (PKY4805),

858 K18Q XmY (PKY4807), K18Q mXmY (PKY4809), K18R mXY (PKY4797), K18R XmY  
859 (PKY4799), K18R mXmY (PKY4801), K27Q mXY (PKY4822), K27Q XmY (PKY4823),  
860 K27Q mXmY (PKY4825), K27R mXY (PKY4813), K27R XmY (PKY4815), K27R mXmY  
861 (PKY4817), K36Q mXY (PKY4829), K36Q XmY (PKY4831), K36Q mXmY (PKY4834),  
862 K37Q mXY (PKY4837), K37Q XmY (PKY4839), K37Q mXmY (PKY4841), P38V mXY  
863 (PKY5033), P38V XmY (PKY5035), P38V mXmY (PKY5037), K36Q mX/P38V mY  
864 (PKY5138), and P38V mX/K36Q mY (PKY5140).

865

866 pWT XY, pseudo WT; mXY, mutation on X; XmY, mutation on Y; and mXmY, mutation  
867 on both X and Y.

868

869 **Figure 5: Double H3K36Q mutants fail to repress cryptic promoters.**

870 A) Northern blot for *STE11* for RNA isolated from the indicated strains, with 25S  
871 Northern shown as a loading control. Top band, which migrates at 2.2 kb, represents  
872 the full-length *STE11* transcript, while the two lower molecular-weight bands correspond  
873 to previously-characterized sense transcripts initiating within the *STE11* coding region  
874 from cryptic promoters (32).

875 B) Quantitation of cryptic transcript levels for *STE11* in the various strains indicated  
876 (n=3). Levels of cryptic transcripts were normalized to full-length. Average and std. dev.  
877 of triplicate measures of these normalized values are graphed on the y-axes.

878

879 Strains analyzed were: WT wt-c (PKY4701), K36Q wt-c (PKY4827), *eaf3Δ* WT wt-c  
880 (PKY5077), *eaf3Δ* K36Q wt-c (PKY5079), P38V wt-c (PKY5031), pWT XY (PKY4704),  
881 K36Q mXY (PKY4829), K36Q XmY (PKY4831), K36Q mXmY (PKY4834), *eaf3Δ* pWT  
882 XY (PKY5081), *eaf3Δ* K36Q mXY (PKY5083), *eaf3Δ* K36Q XmY (PKY5086) and *eaf3Δ*  
883 K36Q mXmY (PKY5087), P38V mXY (PKY5033), P38V XmY (PKY5035), P38V mXmY  
884 (PKY5037), K36Q mX/P38V mY (PKY5138), and P38V mX/K36Q mY (PKY5140).

885

886 pWT\_XY, pseudo wild-type; mXY, mutation on X; XmY, mutation on Y; and mXmY,  
887 mutation on both X and Y.

888

889 **Figure 6: H3S10A affects histone crosstalk in cis.**

890 A) Mass spectrometric analysis of H3X/H3Y heterodimers expressing one biotin-labeled  
891 subunit, with a S10A point mutation either located on the same H3 molecule (in cis), or  
892 in trans. Left: Schematic of asymmetric nucleosomes. Right: Robust avidin-affinity  
893 purification of biotin-labeled H3 molecules. Mass spec quantitation of peptides

894 (described on top of the graphs) from the strains with genotypes indicated on the x-  
895 axes. For each peptide, raw peak area scores were normalized by dividing by the peak  
896 areas of an internal control, the unmodified H3 peptide containing K42. Average and  
897 std. dev. of triplicate measures of these normalized values are graphed on the y-axes.  
898 As expected, S10A-containing peptides were only detected when present in cis on the  
899 biotin-labeled histone, but not when expressed in trans on the heterodimeric partner.  
900 B) H3K9 acetylation levels are diminished in cis in H3S10A mutants. Data are shown for  
901 mass spec analysis of the indicated mutant strains. Left two bars show data for wild-  
902 type and double H3S10A mutants on the background of a wild-type H3-H3 interface.  
903 Right four panels show H3K9Ac levels on an avidin-purified biotin-tagged H3 molecule,  
904 showing data for H3X acetylation in the context of the pseudo-wild type H3X/Y  
905 background, H3X acetylation on the same (cis) or opposite tail from an H3S10A  
906 mutation, and H3X acetylation in a double H3XS10A/H3YS10A mutant.

907 C) Western blots confirming effects of symmetric S10A on K9 acetylation both on the  
908 WT H3-H3 background, and on the X-Y background, as indicated. For the right panel,  
909 the epitope tag present on H3X allows separate probing of the H3X and H3Y molecules.  
910 Total protein on blots was visualized by Ponceau S staining. Note that although the  
911 S10A mutation in principle might affect anti-H3K9ac antibody (Abcam ab10812) binding,  
912 these results are highly concordant with the mass spectrometry measurements in panel  
913 (B), where the ability to detect lysine acetylation (based on peptide mass) is unaffected  
914 by the difference between S10 and S10A.

915 D-F) Quantitation of blots from panel (C). K9Ac signals were normalized to total protein  
916 detected by Ponceau S.

917 Strains analyzed were: WT wt-C (PKY4610), S10A wt-C (PKY5003), pWT-XY  
918 (PKY4983), S10A-XY-cis (PKY5005), S10A-XY trans (PKY4986) and S10A-XY double  
919 (PKY5042).

920

921

## 922 **SUPPLEMENTAL MATERIALS**

923 **Supplementary File 1**

924 **Figure 1-figure supplement 1**

925 **Figure 2-figure supplements 1-2**

926 **Figure 3-figure supplement 1**

927 **Figure 4-figure supplements 1-3**

928 **Figure 5-figure supplement 1**

929

930

931 **SUPPLEMENTARY FILES**

932 **Supplementary Table 1. Yeast strain list.**

933

934

935 **SUPPLEMENTAL FIGURE LEGENDS**

936 **Figure 1-figure supplement 1**

937 **Optimization of the H3X/H3Y design.**

938 A) Genetic analysis of the original H3X design. The top four panels are identical to  
939 **Figure 1C**, showing growth of H3X/H3Y-bearing yeast strains but no growth of H3Y-  
940 bearing strains, and are duplicated here for comparison to H3X growth phenotypes.  
941 Bottom two panels: Yeast bearing a wild type histone-*URA3* shuffle plasmid were  
942 transfected with the indicated plasmids carrying a wild-type H4 gene and the original  
943 H3X (126V, 130V) gene. Three independent isolates of each strain were patched onto  
944 5-FOA media to select for loss of the wild type histone-*URA3* plasmid. Strains were  
945 grown for the indicated number of days and photographed. The growth of papillae in the  
946 absence of H3Y upon extended incubation led us to optimize H3X by randomization of  
947 four key residues, as shown below.

948 B) Sequencing traces for the four “H3X\*” libraries, each with one randomly mutagenized  
949 codon as indicated. Although the base utilization in the synthetic oligonucleotides is not  
950 completely equal, all four bases are readily detected at each position.

951 C) Schematic of the screening strategy. Transformants carrying the H3X\* library alleles  
952 were plated on SC-Trp and replicated onto FOA plates. Strains that couldn’t survive on  
953 FOA with H3\* alone were transformed with an H3Y-expressing plasmid, and then were  
954 tested on FOA media to assess the viability of the H3X\*-H3Y combinations (as shown in  
955 **Figure 1C**). As an additional criterion, we tested whether the two plasmids expressing  
956 the new H3X/H3Y heterodimers were stable when cells were cultured in rich media in  
957 the absence of selection for either plasmid. Repeated rounds of streaking on rich (YPD)  
958 plates or culturing in YPD media yielded colonies that all maintained a Trp<sup>+</sup>Leu<sup>+</sup>  
959 phenotype, indicating that neither plasmid could be lost. Furthermore, resequencing of  
960 plasmids isolated after growth on YPD detected no reversion of the engineered H3X or  
961 H3Y in 96 independent isolates. Together, the genetic data strongly suggest that the  
962 H3X/H3Y combinations are obligate heterodimers, and that neither H3X nor H3Y can  
963 homodimerize at sufficient levels to support viability.

964

#### 965 **Figure 2-figure supplement 1**

#### 966 **DMS crosslinking efficiency.**

967 A) Schematic for in vivo biochemical analysis of H3 dimerization. Yeast strains used  
968 were PKY4616 (top, biotin-tagged wild-type H3 + V5-tagged wild-type H3), PKY4625  
969 (middle, biotin-H3X + V5-H3X + Myc-H3Y), and PKY4694 (bottom, biotin-H3Y + V5-H3X  
970 + Myc-H3Y).

971 B) Immunoblot analysis of strains shown in (A). Whole cell extracts after 0 or 60  
972 minutes of DMS crosslinking (- DMS or + DMS, respectively) were separated by 17%  
973 SDS-PAGE, transferred to a membrane, and probed with anti-V5 antibody.

974 C) Quantitation of the dimer/monomer ratio of H3 proteins after DMS crosslinking. The  
975 mean and standard deviation for 3 independent replicate experiments are graphed.

976

#### 977 **Figure 2-figure supplement 2**



978 **Western blot analysis of asymmetric nucleosome formation in vivo.**

979 A) Immunoblot analysis of Biotin-H3X<sup>126A</sup> strain. Lanes 3-4 and 7-8 from these gels are  
980 reproduced in **Figures 2B, E**. Lanes 1-2: whole cell extracts after 0 or 60 minutes of  
981 DMS crosslinking. Lanes 3-8: DMS-crosslinked, MNase-digested chromatin from the  
982 indicated strains was precipitated with streptavidin-agarose to capture biotinylated (Bio)  
983 H3. I=Input, U= Unbound: 0.75% and 1.5% of total shown in adjacent lanes; B = Bound:  
984 10 and 20% of total shown. Proteins were separated by 17% SDS-PAGE, transferred to  
985 a membrane, and probed sequentially with the indicated primary antibodies. Arrow  
986 indicates the expected size of crosslinked H3-H3 dimer species, while asterisk indicates  
987 monomeric H3 molecules – presence of V5-tagged H3X (left panel) at this position in  
988 the bound fraction reflects bead contamination by uncrosslinked H3 molecules.

989 B) As in A, for biotin-H3Y.

990

991 **Figure 3-figure supplement 1**

992 **Generation of asymmetric X/Y nucleosomes for in vitro studies.**

993 A) Purified recombinant histones.

994 B) Replicate size exclusion (Superdex 200 Increase 3.2/300) gel filtration profiles  
995 showing the purification of octamer refolding reactions containing wild-type and  
996 heterodimer 'X' and 'Y' histone H3. As in **Figure 3A**, with additional replicate shown.

997 C) Coomassie Blue G staining of affinity-purified chromatin composed of asymmetric  
998 nucleosomes. Chromatin was washed with buffer containing 0.1% Triton X100 and 0.5  
999 M NaCl and purified by binding to streptavidin-agarose in the same buffer. Strains  
1000 expressed the indicated combination of X-Y asymmetric H3s. 10  $\mu$ l (lanes 1, 4, 6), 5  $\mu$ l  
1001 (lanes 2, 5, 7) or 2.5  $\mu$ l (lane 3) of the bound material was analyzed on a 15% SDS-  
1002 PAGE gel.

1003

1004 **Figure 4-figure supplement 1**

1005 **Significant growth defects for the H3K36Q double mutant, relative to either single**  
1006 **mutant.**

1007 A) The X/Y interface confers slow growth relative to the wild-type H3 interface. Growth  
1008 rates of the indicated strains are shown for growth in liquid YPD media at 30C in well-  
1009 aerated flasks. Strains analyzed were BY4741 (wild-type strain with no histone gene  
1010 deletions), "wt H3" = PKY4701, the histone shuffle strain with a plasmid expressing wild-  
1011 type H3/H4,  $\psi$ wt X-Y#1 and #2 = PKY4704 and 4705, two different PKY4701  
1012 derivatives coexpressing the heterodimeric X-Y H3 derivatives.

1013 B) Dot plots show all growth rates in 0.8M KCl for all individual replicate time courses for  
1014 the indicated H3K36Q mutants. These measurements were performed in 96-well plates.

1015

### 1016 **Figure 4-figure supplement 2**

#### 1017 **Temperature sensitivity of various histone mutant strains.**

1018 For all panels, serial dilutions of the indicated strains were plated at 30 C, 34 C, or 37 C,  
1019 as indicated.

1020 A) Data for WT wt-c (PKY4701), K36Q wt-c (PKY4827), P38V wt-c (PKY5031), *eaf3 $\Delta$*   
1021 WT wt-c (PKY5077) and *eaf3 $\Delta$*  K36Q wt-c (PKY5079).

1022 B) Data for WT wt-c (PKY4701), K14R wt-c (PKY4779), K14Q wt-c (PKY4787) and  
1023 K56R wt-c (PKY4843).

1024 C) Data for pWT XY (PKY4704), *eaf3 $\Delta$*  pWT XY (PKY5081), *eaf3 $\Delta$*  K36Q mXY  
1025 (PKY5083), *eaf3 $\Delta$*  K36Q XmY (PKY5086) and *eaf3 $\Delta$*  K36Q mXmY (PKY5087).

1026 D) Data for pWT XY (PKY4704), K14R mXY (PKY4781), K14R XmY (PKY4783) and  
1027 K14R mXmY (PKY4786).

1028 E) Data for pWT XY (PKY4704), K14Q mXY (PKY4789), K14Q XmY (PKY4791) and  
1029 K14Q mXmY (PKY4793)

1030 pWT\_XY, pseudo WT; mXY, mutation on X; XmY, mutation on Y; and mXmY, mutation  
1031 on both X and Y.

1032

### 1033 **Figure 4-figure supplement 3**

#### 1034 **H3P38V mutations block trimethylation but not dimethylation of H3K36.**

1035 Whole cell extracts of the indicated strains were separated by 15% SDS-PAGE and  
1036 transferred to a membrane. The same blot was probed sequentially with the following  
1037 antibodies: anti-H3K36me3 (Active Motif MABI0333), anti-H3K36me2 (Abcam ab9049)

1038 and anti-H3K79me3 (GeneTexRM157). Strains analyzed were: pWT XY (PKY4704),  
1039 K36Q mXmY (PKY4834), P38V\_X/K36Q\_Y (PKY5140), P38V mXmY (PKY5037).

1040

## 1041 **Figure 5-figure supplement 1**

### 1042 **Effects of H3K36Q mutants on cryptic transcription.**

1043 As in **Figure 5**, with *FLO8* used as a probe for Northern blots in place of *STE11*.

1044

## 1045 **REFERENCES**

1046

1047

- 1048 1. A. L. Hughes, O. J. Rando, Mechanisms Underlying Nucleosome Positioning in vivo. *Annual*  
1049 *review of biophysics*, (2014).
- 1050 2. R. D. Kornberg, Y. Lorch, Twenty-five years of the nucleosome, fundamental particle of the  
1051 eukaryote chromosome. *Cell* **98**, 285-294 (1999).
- 1052 3. P. Voigt *et al.*, Asymmetrically modified nucleosomes. *Cell* **151**, 181-193 (2012).
- 1053 4. E. Shema *et al.*, Single-molecule decoding of combinatorially modified nucleosomes. *Science*  
1054 *(New York, N.Y)* **352**, 717-721 (2016).
- 1055 5. H. S. Rhee, A. R. Bataille, L. Zhang, B. F. Pugh, Subnucleosomal Structures and Nucleosome  
1056 Asymmetry across a Genome. *Cell* **159**, 1377-1388 (2014).
- 1057 6. S. Ramachandran, G. E. Zentner, S. Henikoff, Asymmetric nucleosomes flank promoters in the  
1058 budding yeast genome. *Genome research* **25**, 381-390 (2015).
- 1059 7. S. Li, M. A. Shogren-Knaak, Cross-talk between histone H3 tails produces cooperative  
1060 nucleosome acetylation. *Proceedings of the National Academy of Sciences of the United States*  
1061 *of America* **105**, 18243-18248 (2008).
- 1062 8. S. Li, M. A. Shogren-Knaak, The Gcn5 bromodomain of the SAGA complex facilitates cooperative  
1063 and cross-tail acetylation of nucleosomes. *The Journal of biological chemistry* **284**, 9411-9417  
1064 (2009).
- 1065 9. K. Luger, A. W. Mader, R. K. Richmond, D. F. Sargent, T. J. Richmond, Crystal structure of the  
1066 nucleosome core particle at 2.8 Å resolution. *Nature* **389**, 251-260 (1997).
- 1067 10. S. L. Mayo, B. D. Olafson, W. A. Goddard, DREIDING: a generic force field for molecular  
1068 simulations. *J Phys Chem* **94**, 8897-8909 (1990).
- 1069 11. D. N. Bolon, R. A. Grant, T. A. Baker, R. T. Sauer, Specificity versus stability in computational  
1070 protein design. *Proceedings of the National Academy of Sciences of the United States of America*  
1071 **102**, 12724-12729 (2005).
- 1072 12. J. Dai *et al.*, Probing nucleosome function: a highly versatile library of synthetic histone H3 and  
1073 H4 mutants. *Cell* **134**, 1066-1078 (2008).
- 1074 13. D. Beckett, E. Kovaleva, P. J. Schatz, A minimal peptide substrate in biotin holoenzyme  
1075 synthetase-catalyzed biotinylation. *Protein Sci* **8**, 921-929 (1999).
- 1076 14. R. D. Kornberg, J. O. Thomas, Chromatin structure; oligomers of the histones. *Science (New York,*  
1077 *N.Y)* **184**, 865-868 (1974).
- 1078 15. J. O. Thomas, Chemical cross-linking of histones. *Methods Enzymol* **170**, 549-571 (1989).

- 1079 16. M. Altaf *et al.*, Interplay of chromatin modifiers on a short basic patch of histone H4 tail defines  
1080 the boundary of telomeric heterochromatin. *Molecular cell* **28**, 1002-1014 (2007).
- 1081 17. L. M. Johnson, P. S. Kayne, E. S. Kahn, M. Grunstein, Genetic evidence for an interaction  
1082 between SIR3 and histone H4 in the repression of the silent mating loci in *Saccharomyces*  
1083 *cerevisiae*. *Proceedings of the National Academy of Sciences of the United States of America* **87**,  
1084 6286-6290 (1990).
- 1085 18. A. Weiner *et al.*, Systematic dissection of roles for chromatin regulators in a yeast stress  
1086 response. *PLoS biology* **10**, e1001369 (2012).
- 1087 19. A. P. Capaldi *et al.*, Structure and function of a transcriptional network activated by the MAPK  
1088 Hog1. *Nature genetics* **40**, 1300-1306 (2008).
- 1089 20. A. P. Gasch *et al.*, Genomic expression programs in the response of yeast cells to environmental  
1090 changes. *Mol Biol Cell* **11**, 4241-4257 (2000).
- 1091 21. D. K. Jha, B. D. Strahl, An RNA polymerase II-coupled function for histone H3K36 methylation in  
1092 checkpoint activation and DSB repair. *Nature communications* **5**, 3965 (2014).
- 1093 22. O. J. Rando, F. Winston, Chromatin and transcription in yeast. *Genetics* **190**, 351-387 (2012).
- 1094 23. B. D. Strahl *et al.*, Set2 is a nucleosomal histone H3-selective methyltransferase that mediates  
1095 transcriptional repression. *Molecular and cellular biology* **22**, 1298-1306 (2002).
- 1096 24. M. J. Carrozza *et al.*, Histone H3 methylation by Set2 directs deacetylation of coding regions by  
1097 Rpd3S to suppress spurious intragenic transcription. *Cell* **123**, 581-592 (2005).
- 1098 25. M. C. Keogh *et al.*, Cotranscriptional set2 methylation of histone H3 lysine 36 recruits a  
1099 repressive Rpd3 complex. *Cell* **123**, 593-605 (2005).
- 1100 26. A. A. Joshi, K. Struhl, Eaf3 chromodomain interaction with methylated H3-K36 links histone  
1101 deacetylation to Pol II elongation. *Molecular cell* **20**, 971-978 (2005).
- 1102 27. C. K. Govind *et al.*, Phosphorylated Pol II CTD recruits multiple HDACs, including Rpd3C(S), for  
1103 methylation-dependent deacetylation of ORF nucleosomes. *Molecular cell* **39**, 234-246 (2010).
- 1104 28. S. Drouin *et al.*, DSIF and RNA polymerase II CTD phosphorylation coordinate the recruitment of  
1105 Rpd3S to actively transcribed genes. *PLoS genetics* **6**, e1001173 (2010).
- 1106 29. J. W. Huh *et al.*, Multivalent di-nucleosome recognition enables the Rpd3S histone deacetylase  
1107 complex to tolerate decreased H3K36 methylation levels. *The EMBO journal* **31**, 3564-3574  
1108 (2012).
- 1109 30. C. J. Nelson, H. Santos-Rosa, T. Kouzarides, Proline isomerization of histone H3 regulates lysine  
1110 methylation and gene expression. *Cell* **126**, 905-916 (2006).
- 1111 31. M. L. Youdell *et al.*, Roles for Ctk1 and Spt6 in regulating the different methylation states of  
1112 histone H3 lysine 36. *Molecular and cellular biology* **28**, 4915-4926 (2008).
- 1113 32. C. D. Kaplan, L. Laprade, F. Winston, Transcription elongation factors repress transcription  
1114 initiation from cryptic sites. *Science (New York, N.Y)* **301**, 1096-1099 (2003).
- 1115 33. T. Suganuma, J. L. Workman, Crosstalk among Histone Modifications. *Cell* **135**, 604-607 (2008).
- 1116 34. W. S. Lo *et al.*, Phosphorylation of serine 10 in histone H3 is functionally linked in vitro and in  
1117 vivo to Gcn5-mediated acetylation at lysine 14. *Molecular cell* **5**, 917-926 (2000).
- 1118 35. S. Liokatis, R. Klingberg, S. Tan, D. Schwarzer, Differentially Isotope-Labeled Nucleosomes To  
1119 Study Asymmetric Histone Modification Crosstalk by Time-Resolved NMR Spectroscopy. *Angew*  
1120 *Chem Int Ed Engl* **55**, 8262-8265 (2016).
- 1121 36. D. Segre, A. Deluna, G. M. Church, R. Kishony, Modular epistasis in yeast metabolism. *Nature*  
1122 *genetics* **37**, 77-83 (2005).
- 1123 37. S. A. Morris *et al.*, Identification of histone H3 lysine 36 acetylation as a highly conserved histone  
1124 modification. *The Journal of biological chemistry* **282**, 7632-7640 (2007).
- 1125 38. C. C. Lechner, N. D. Agashe, B. Fierz, Traceless Synthesis of Asymmetrically Modified Bivalent  
1126 Nucleosomes. *Angew Chem Int Ed Engl* **55**, 2903-2906 (2016).

- 1127 39. M. A. Shogren-Knaak, C. J. Fry, C. L. Peterson, A native peptide ligation strategy for deciphering  
1128 nucleosomal histone modifications. *The Journal of biological chemistry* **278**, 15744-15748  
1129 (2003).
- 1130 40. D. J. McKay *et al.*, Interrogating the function of metazoan histones using engineered gene  
1131 clusters. *Developmental cell* **32**, 373-386 (2015).
- 1132 41. M. F. Dion *et al.*, Dynamics of replication-independent histone turnover in budding yeast.  
1133 *Science (New York, N.Y)* **315**, 1405-1408 (2007).
- 1134 42. J. Recht *et al.*, Histone chaperone Asf1 is required for histone H3 lysine 56 acetylation, a  
1135 modification associated with S phase in mitosis and meiosis. *Proceedings of the National*  
1136 *Academy of Sciences of the United States of America* **103**, 6988-6993 (2006).
- 1137 43. H. Klinker, C. Haas, N. Harrer, P. B. Becker, F. Mueller-Planitz, Rapid purification of recombinant  
1138 histones. *PloS one* **9**, e104029 (2014).
- 1139 44. T. C. Miller *et al.*, A bromodomain-DNA interaction facilitates acetylation-dependent bivalent  
1140 nucleosome recognition by the BET protein BRDT. *Nature communications* **7**, 13855 (2016).
- 1141 45. K. Luger, T. J. Rechsteiner, T. J. Richmond, Preparation of nucleosome core particle from  
1142 recombinant histones. *Methods Enzymol* **304**, 3-19 (1999).
- 1143 46. B. MacLean *et al.*, Skyline: an open source document editor for creating and analyzing targeted  
1144 proteomics experiments. *Bioinformatics* **26**, 966-968 (2010).
- 1145 47. M. A. Collart, S. Oliviero, Preparation of yeast RNA. *Curr Protoc Mol Biol* **Chapter 13**, Unit13 12  
1146 (2001).
- 1147 48. N. Morohashi *et al.*, Effect of sequence-directed nucleosome disruption on cell-type-specific  
1148 repression by alpha2/Mcm1 in the yeast genome. *Eukaryot Cell* **5**, 1925-1933 (2006).
- 1149 49. S. G. Pattenden, M. M. Gogol, J. L. Workman, Features of cryptic promoters and their varied  
1150 reliance on bromodomain-containing factors. *PloS one* **5**, e12927 (2010).

1151

Figure 1

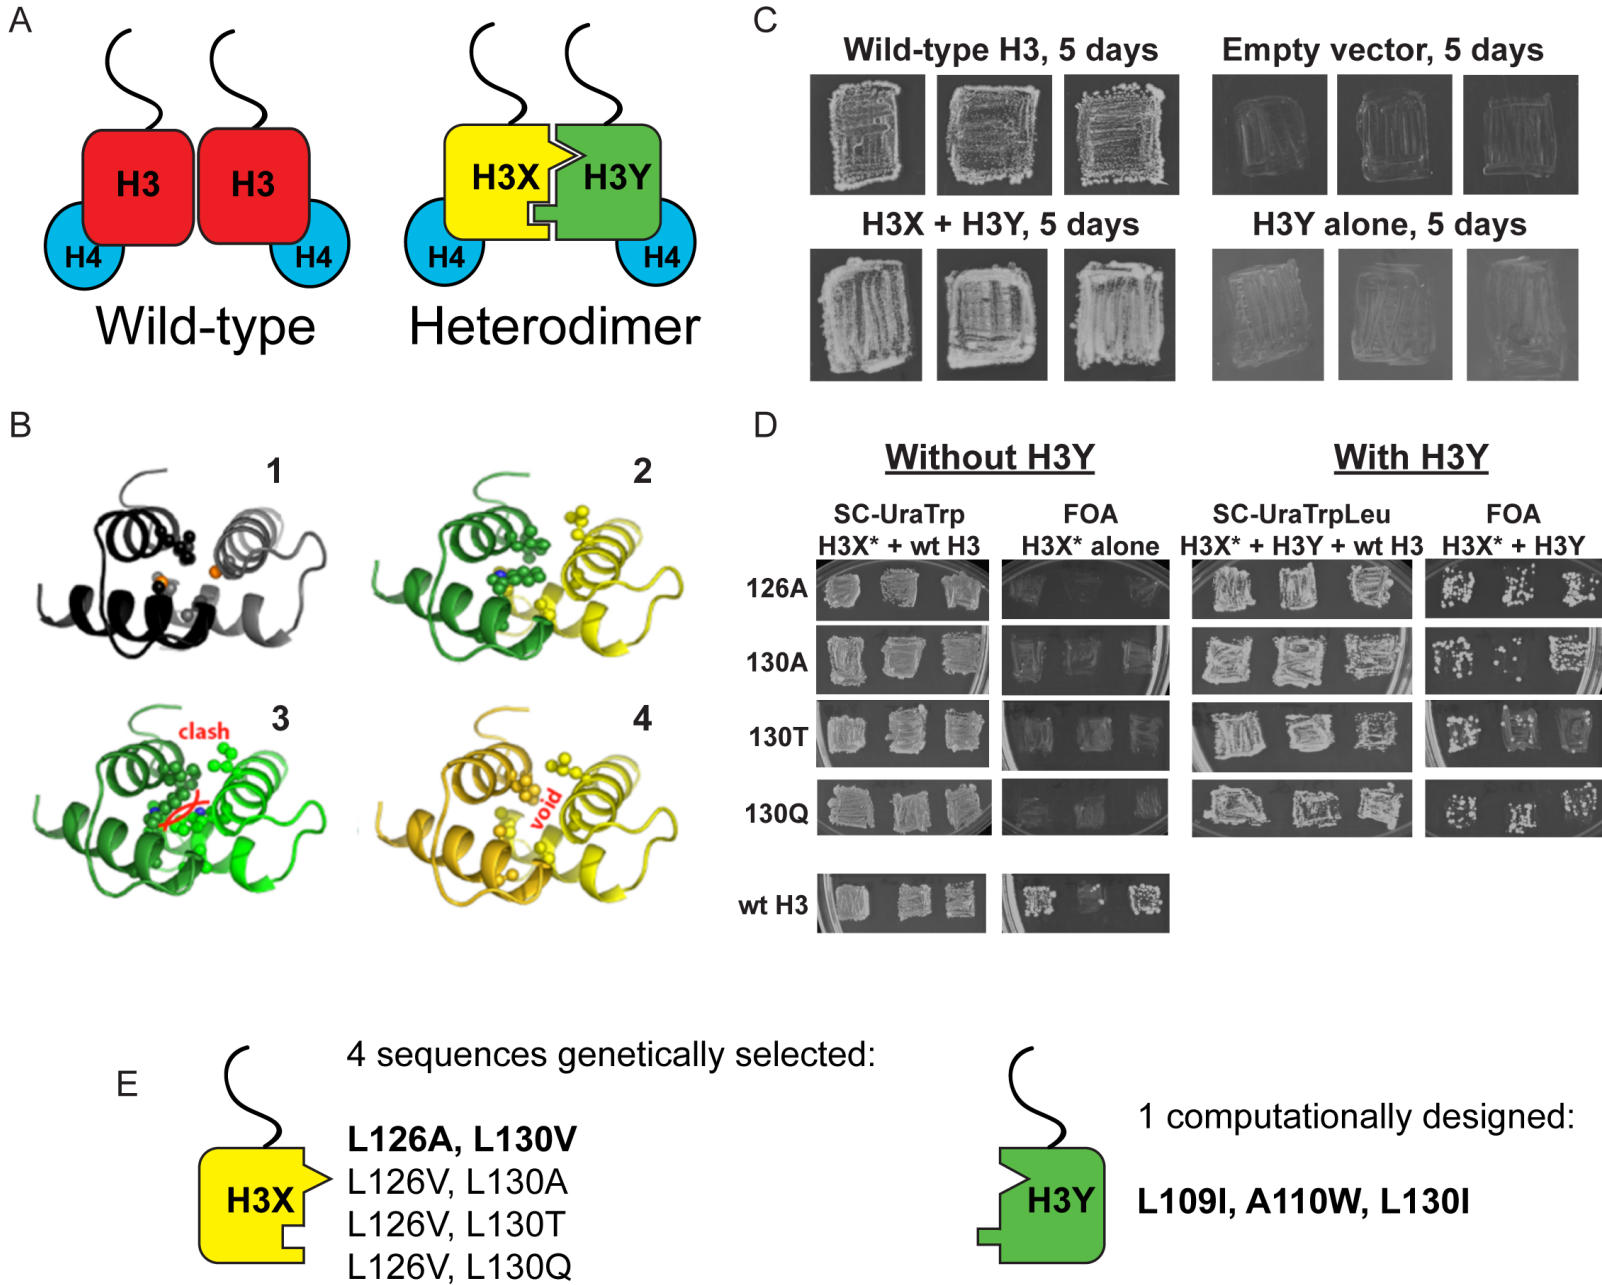



Figure 1 Supplement 1

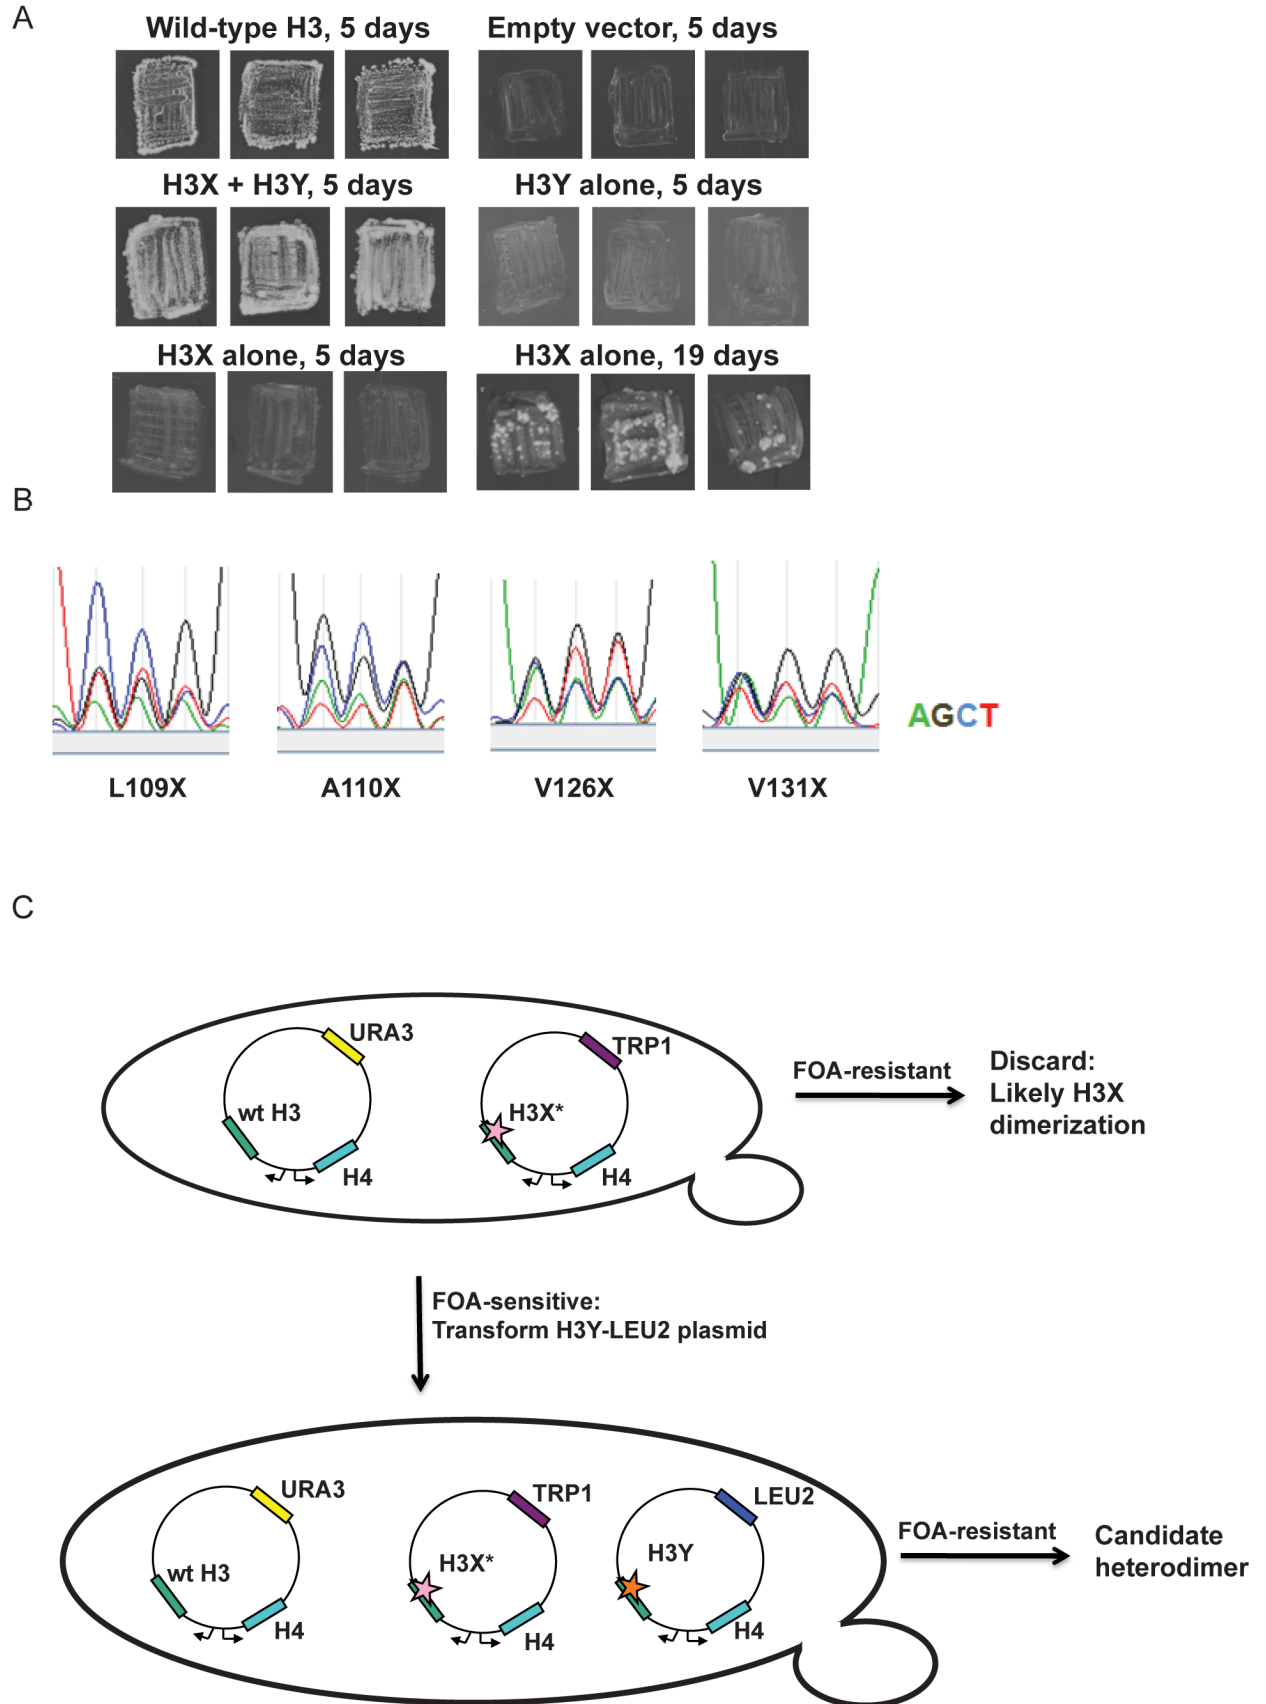

## Figure 2

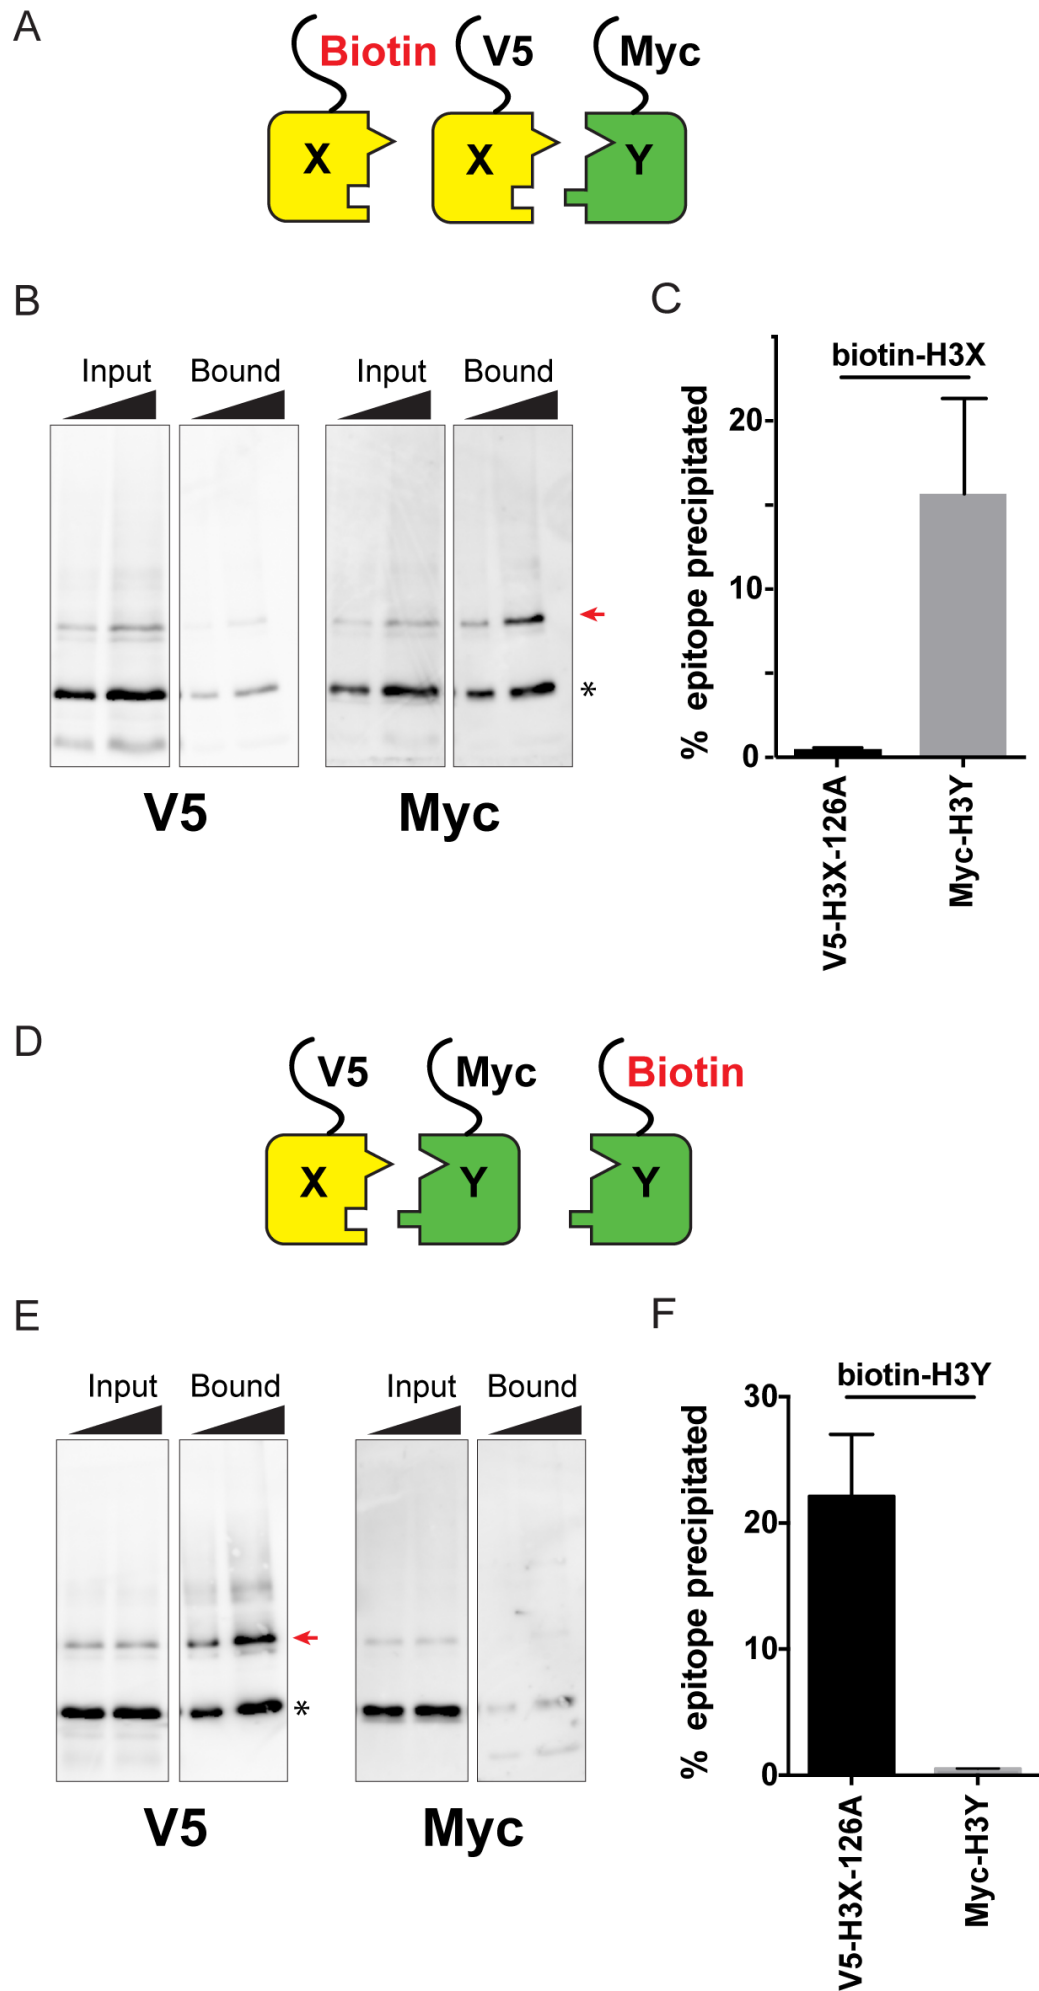

Figure 2 Supplement 1

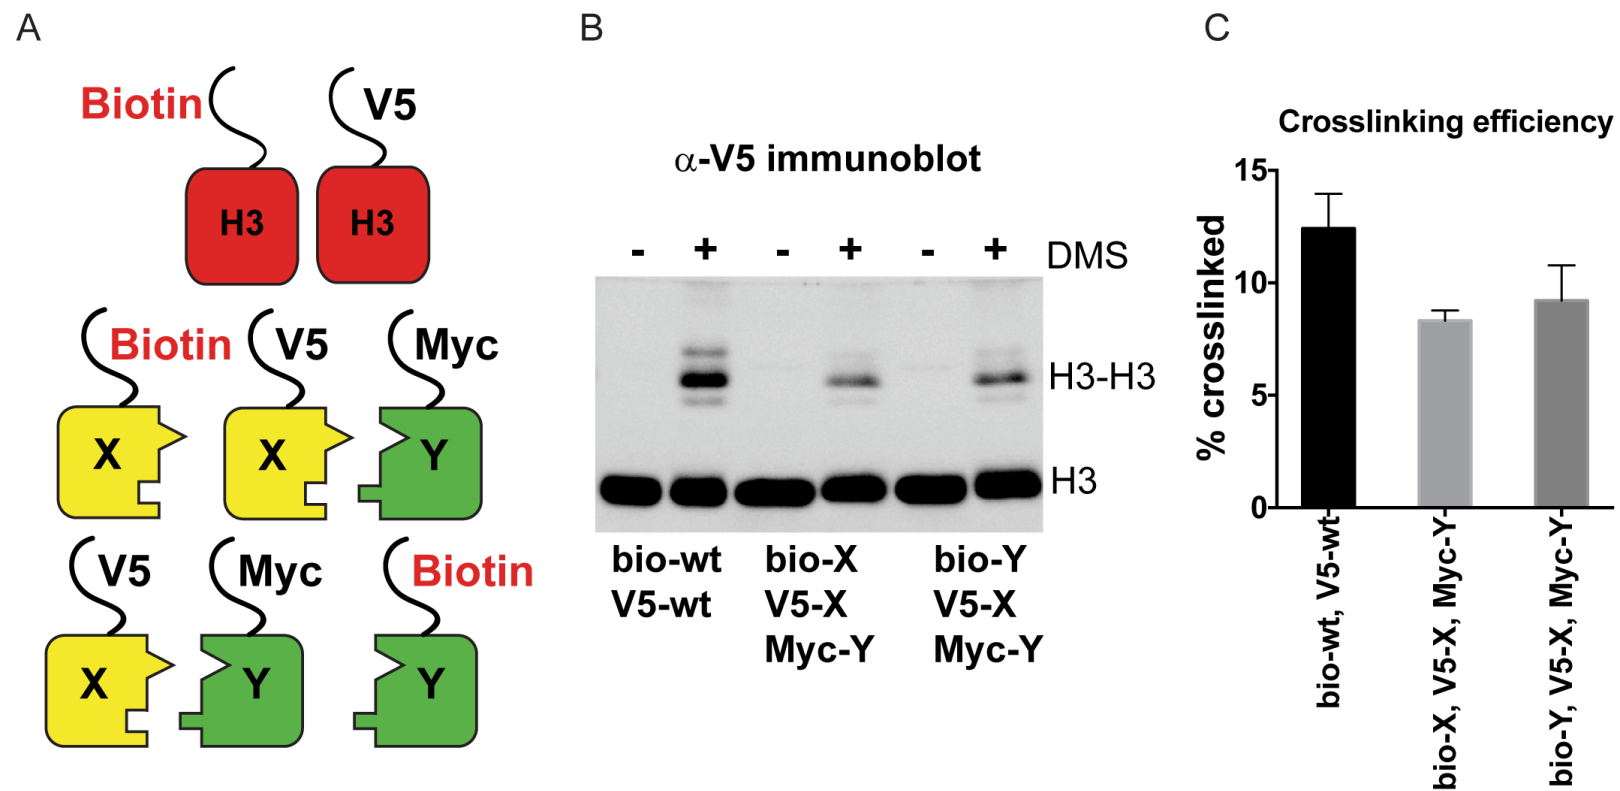

## Figure 2 Supplement 2

A

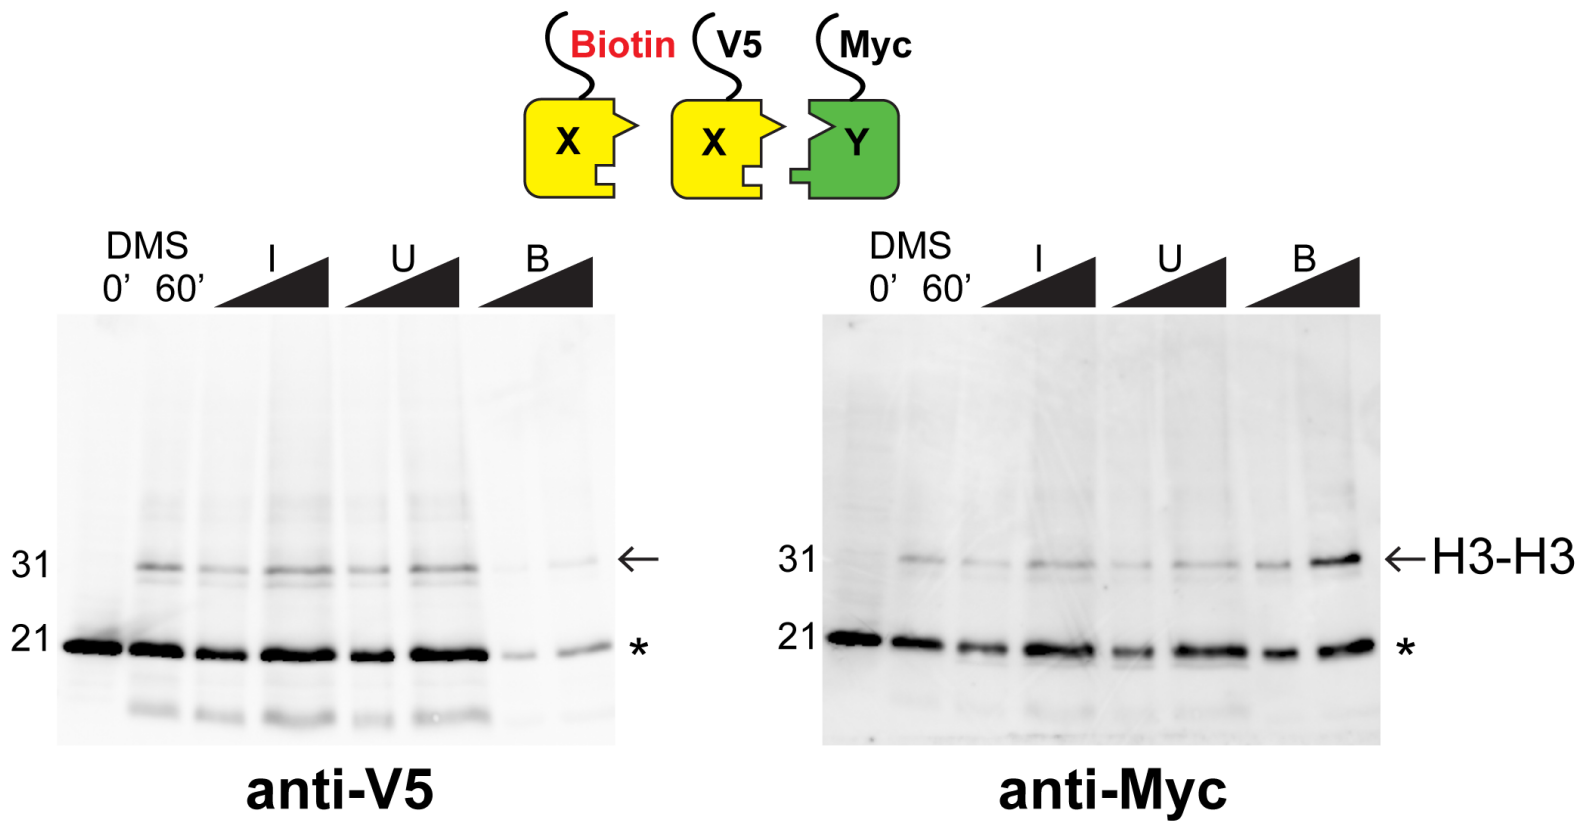

B

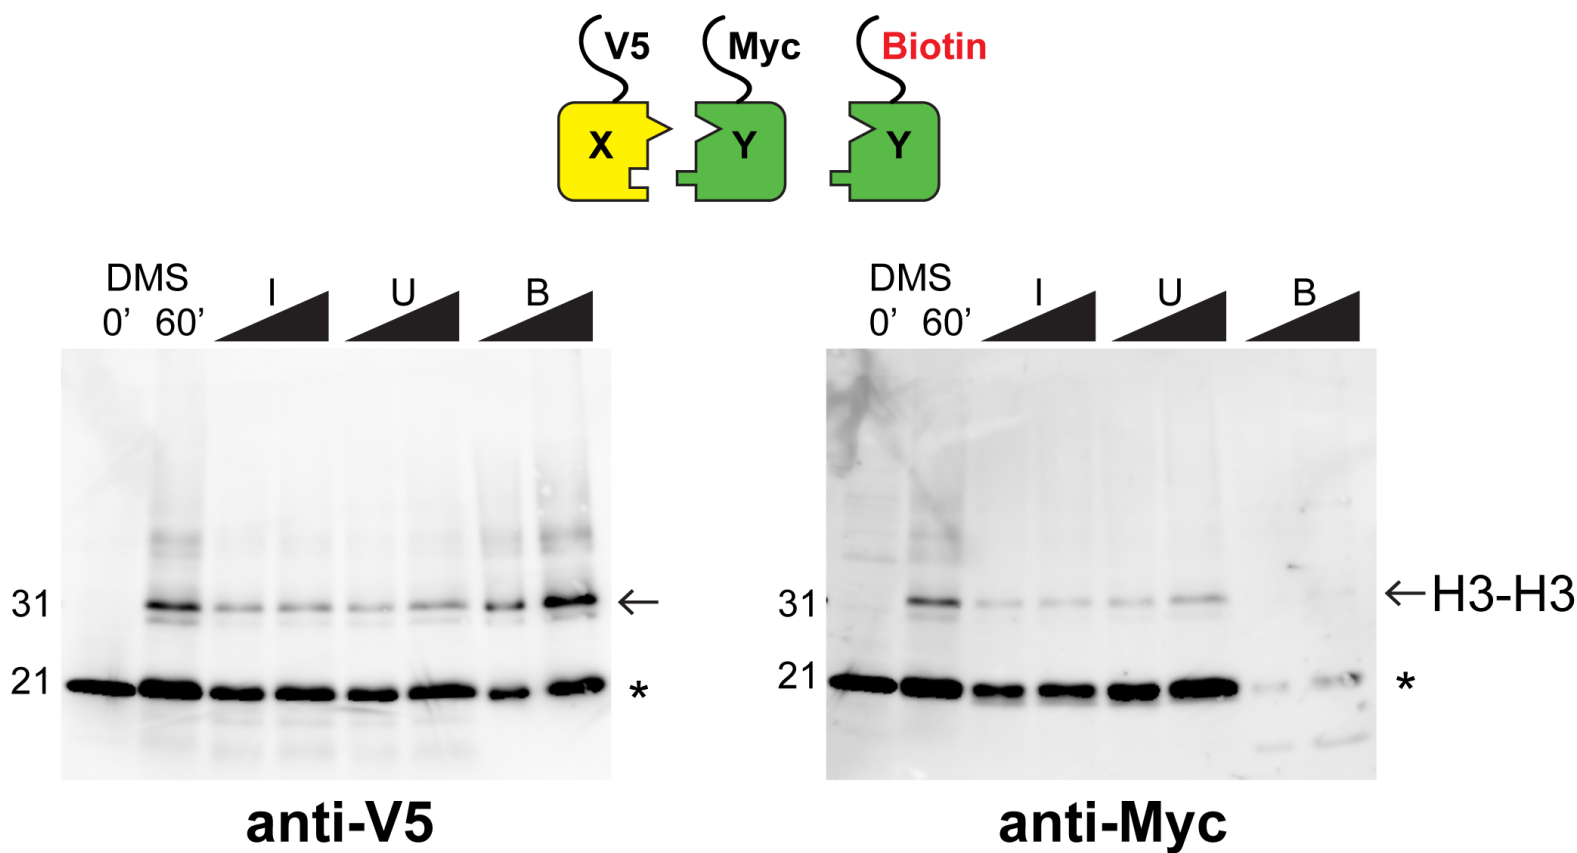

Figure 3

A

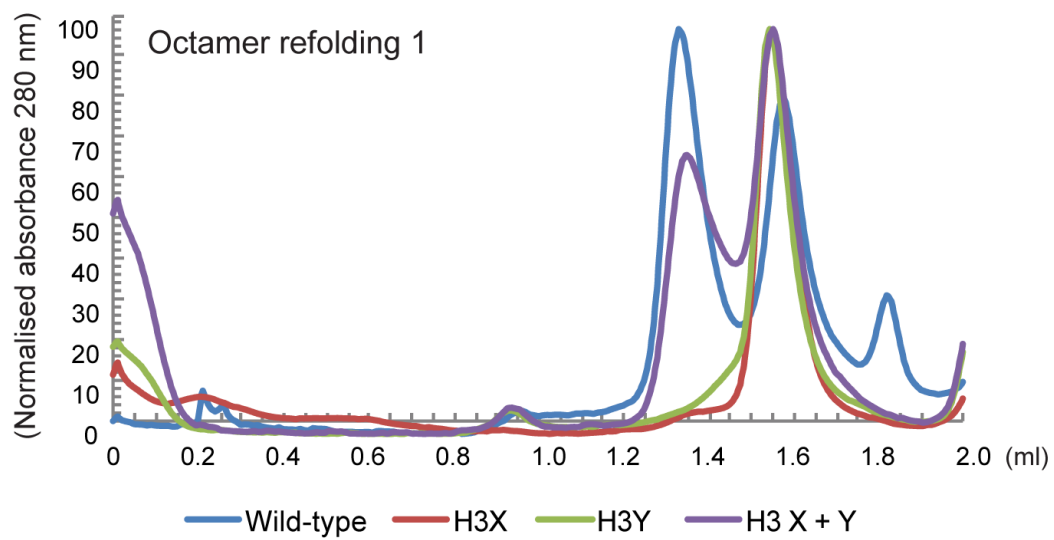

B

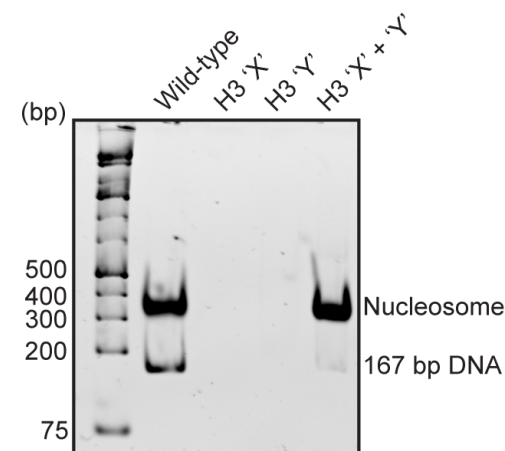

## Figure 3 Supplement 1

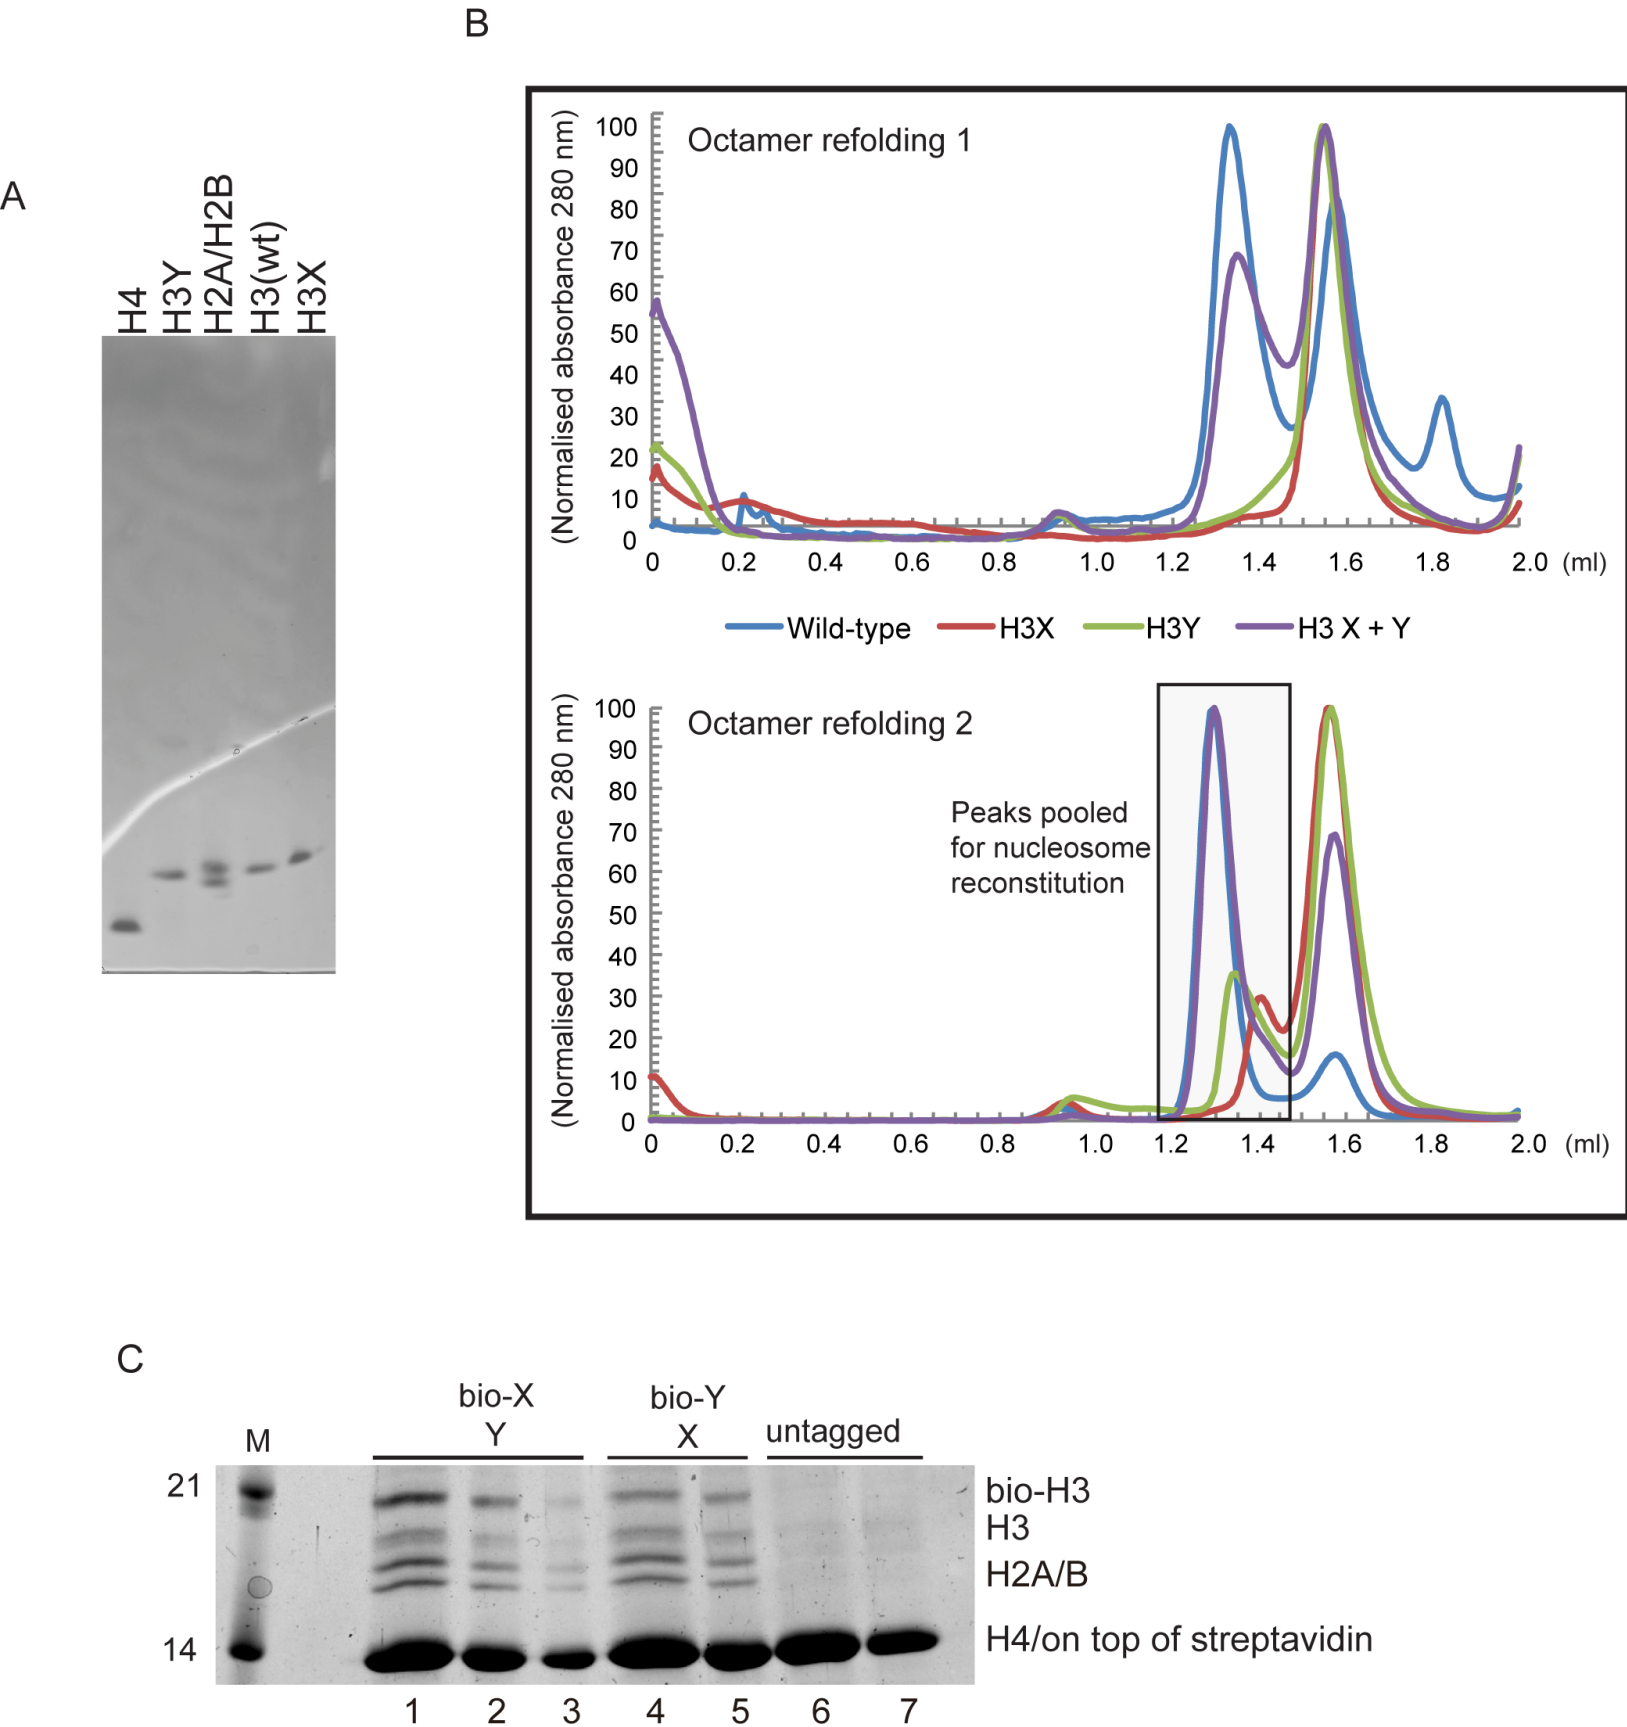



Figure 4

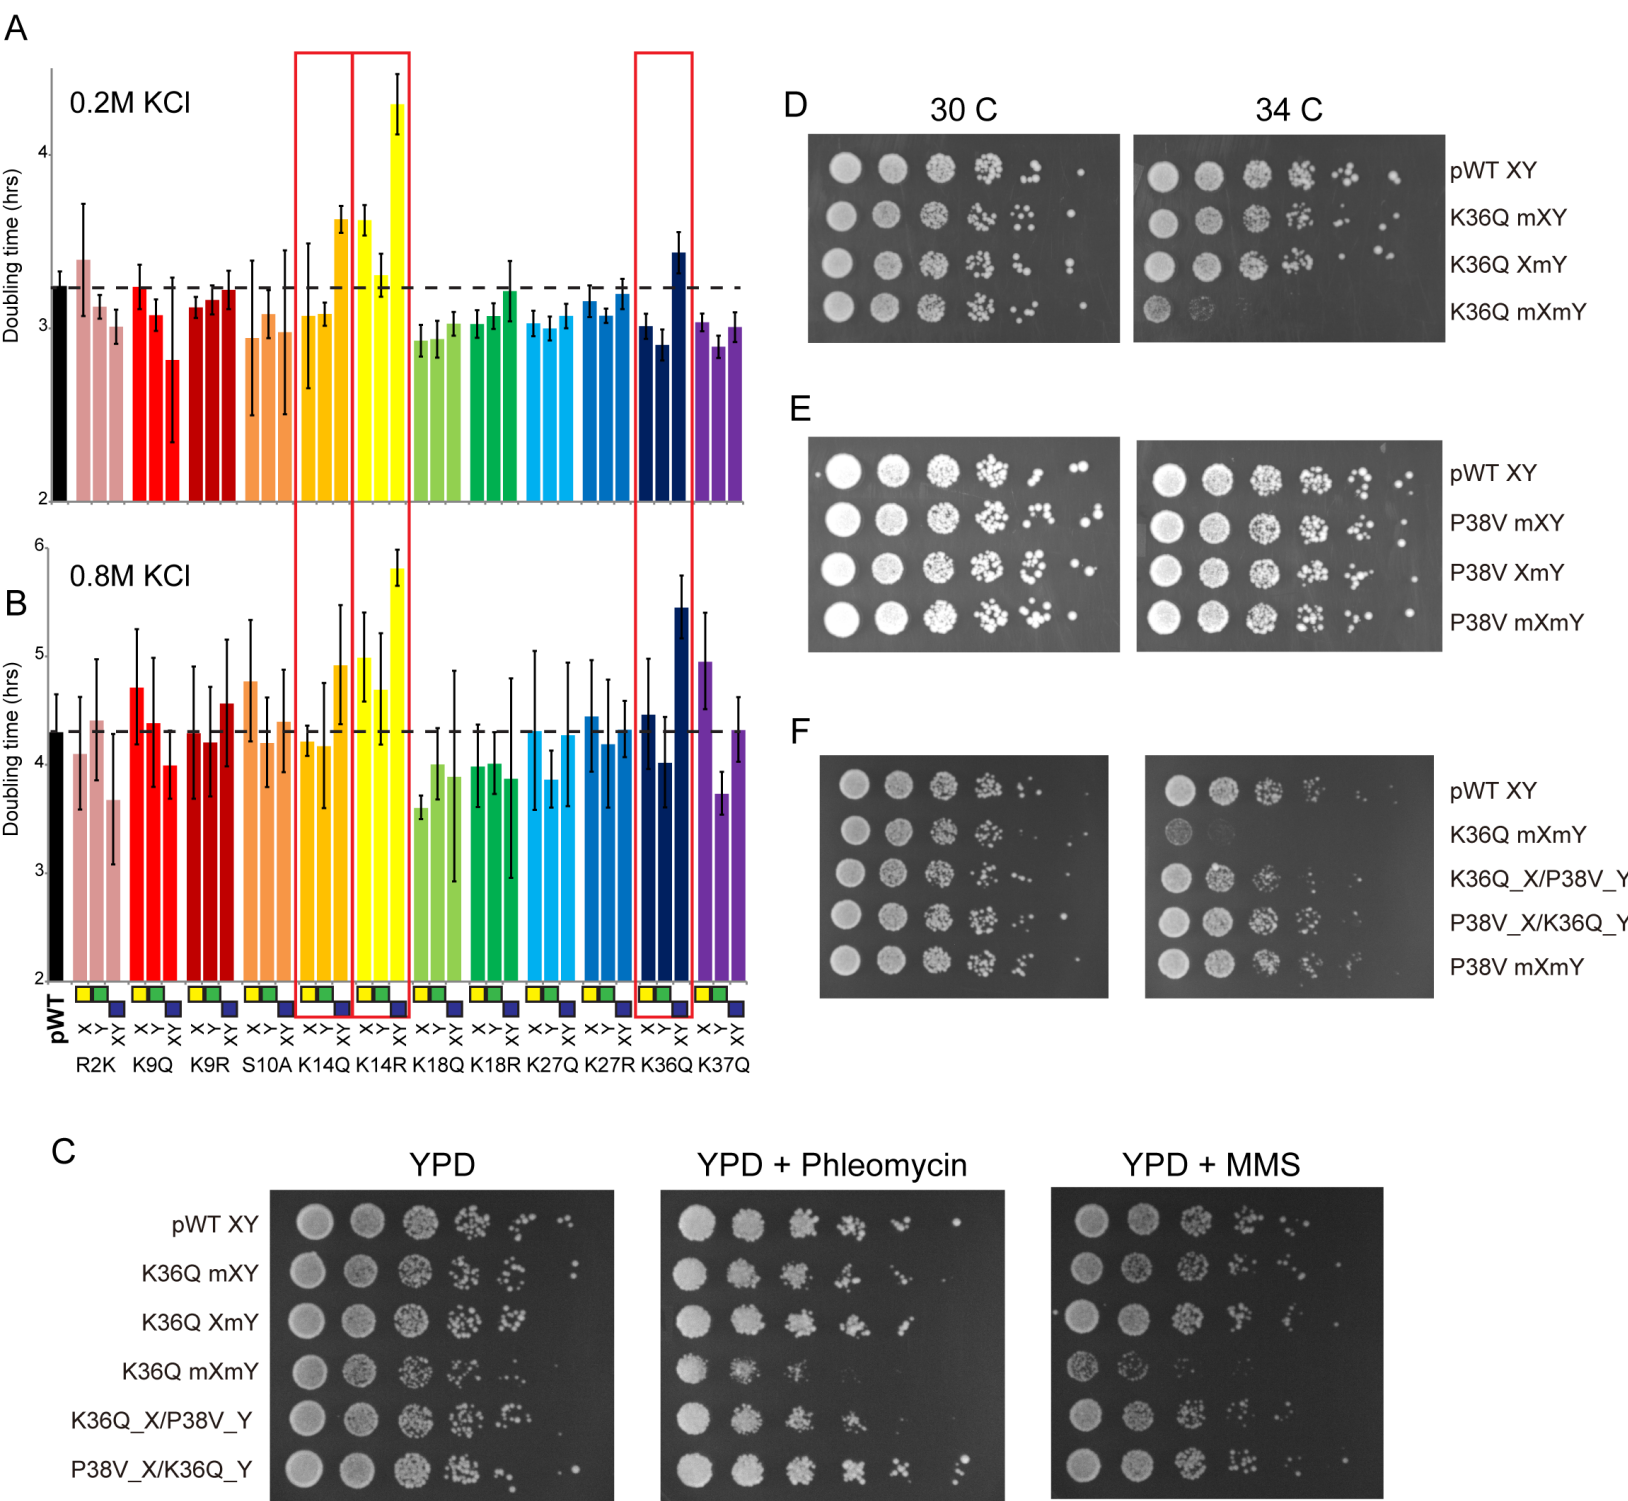

# Figure 4 Supplement 1

A

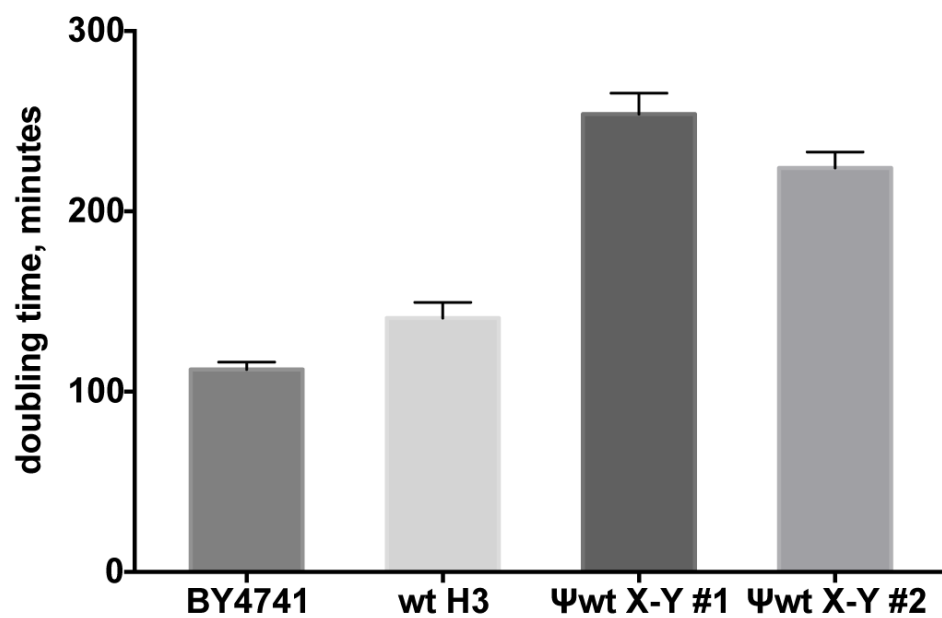

B

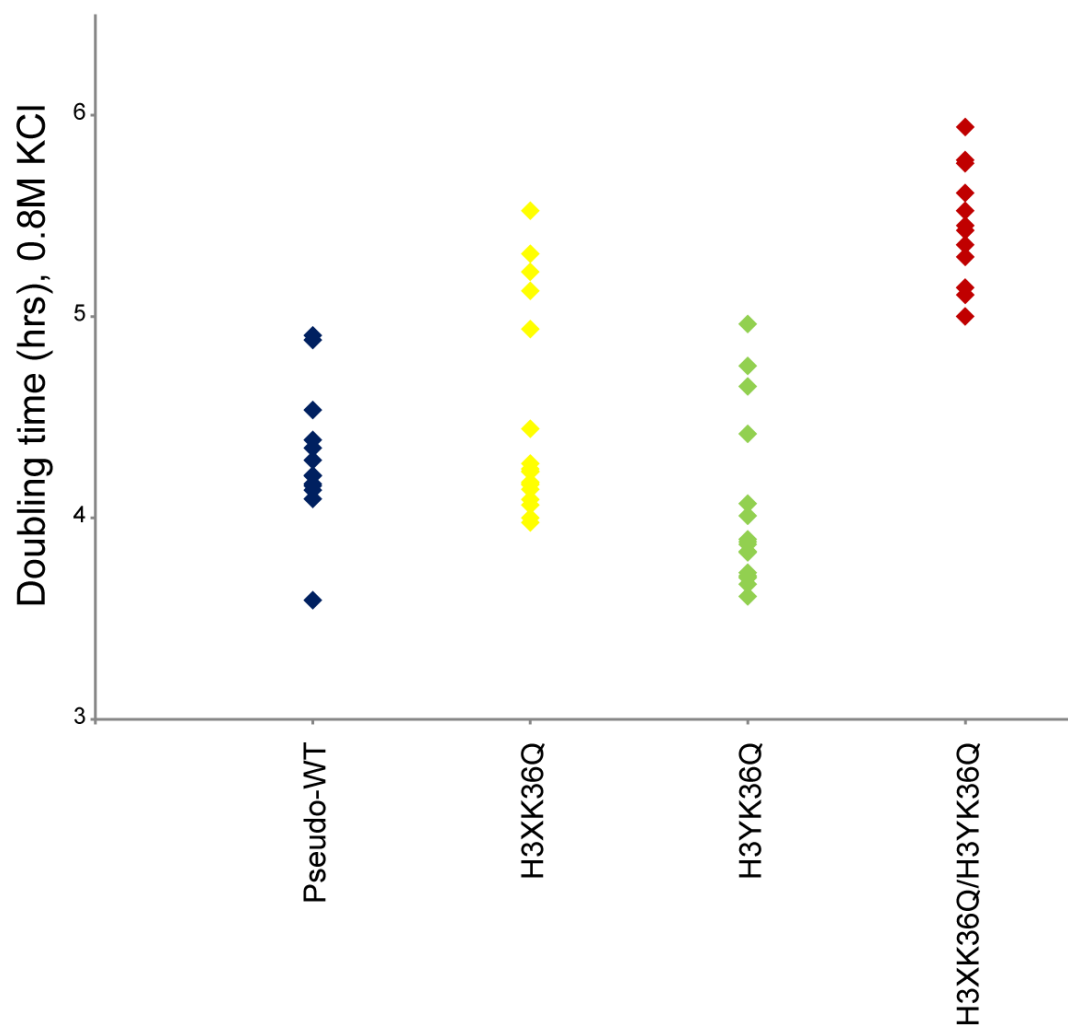

# Figure 4 Supplement 2

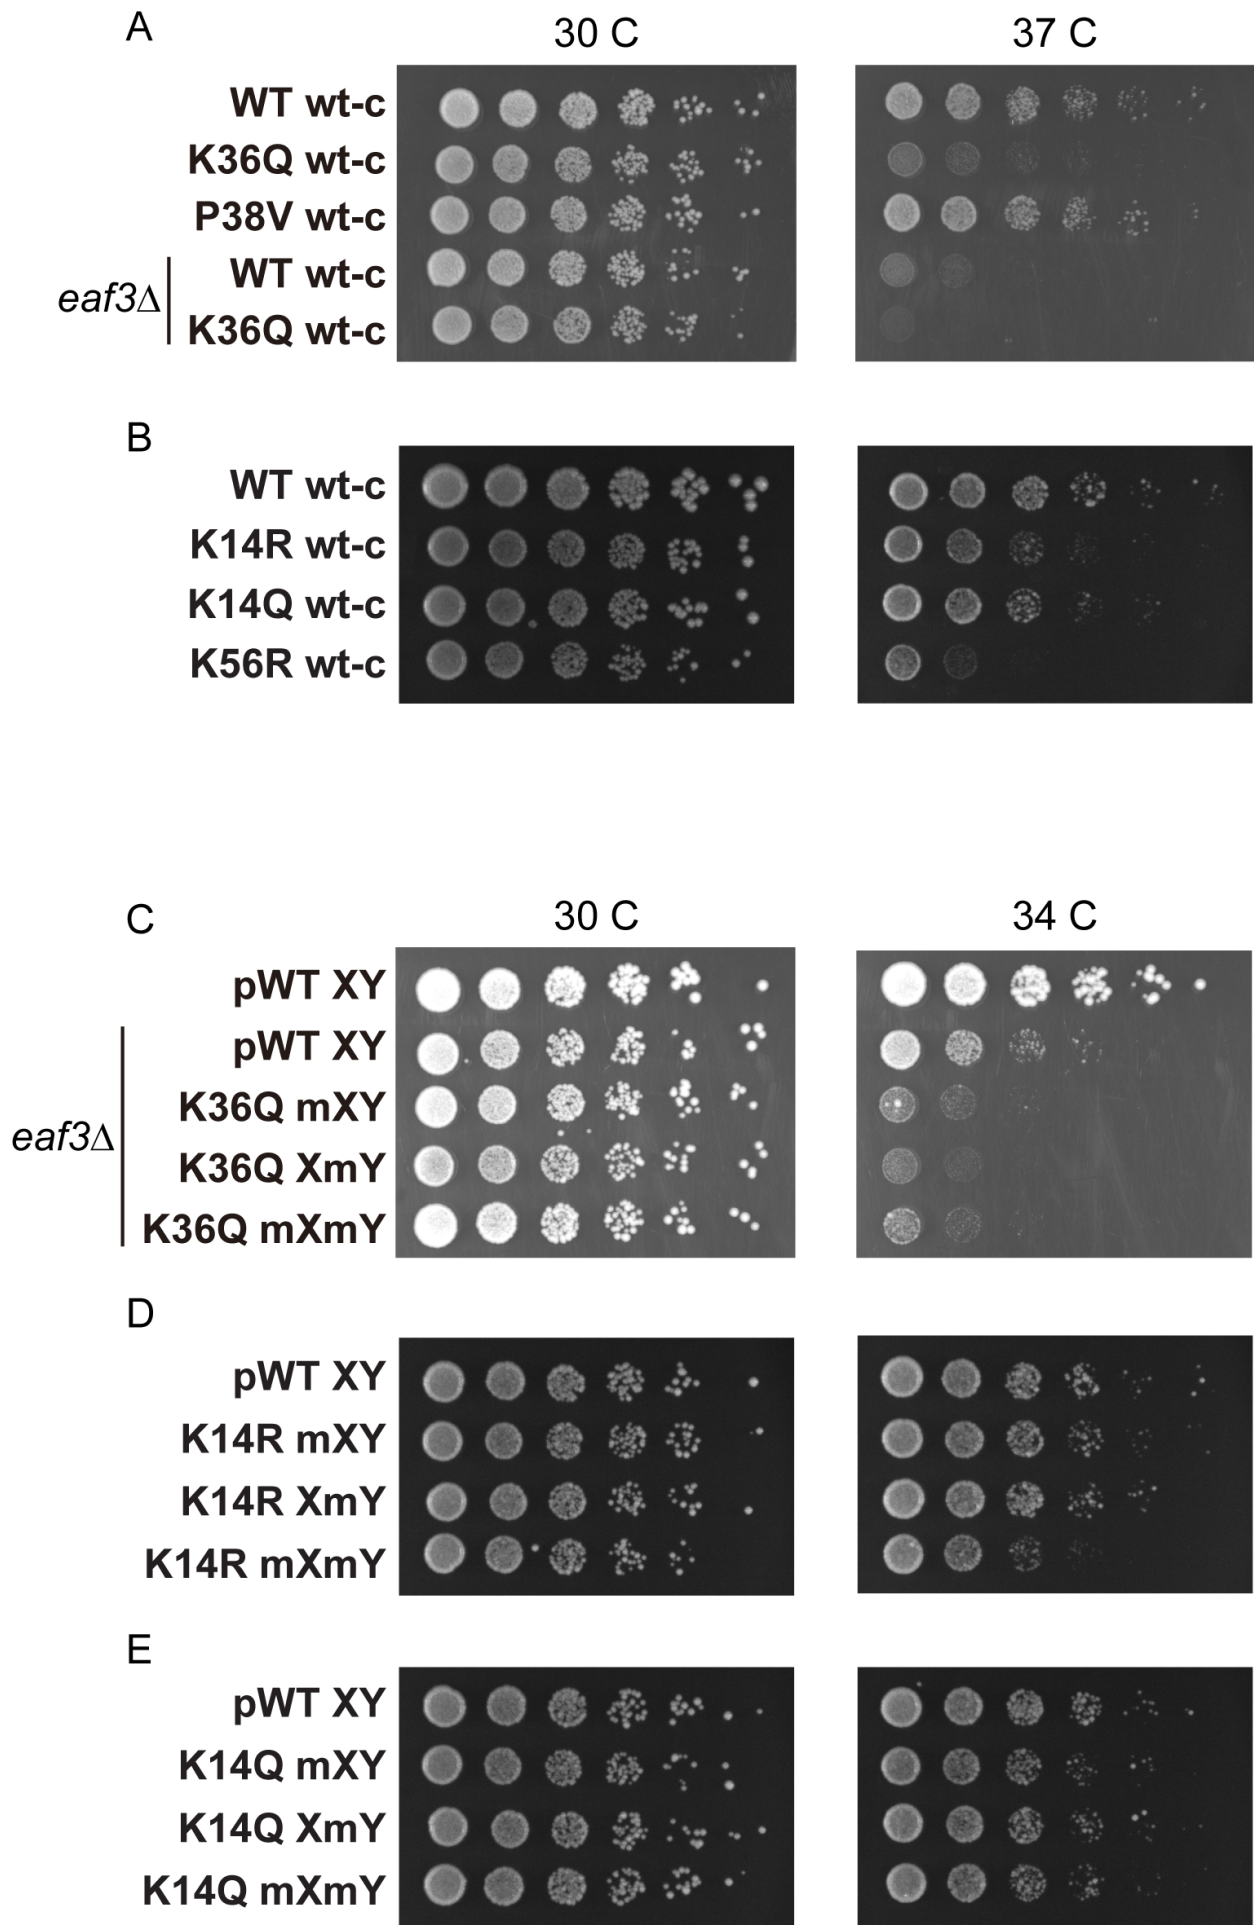

# Figure 4 Supplement 3

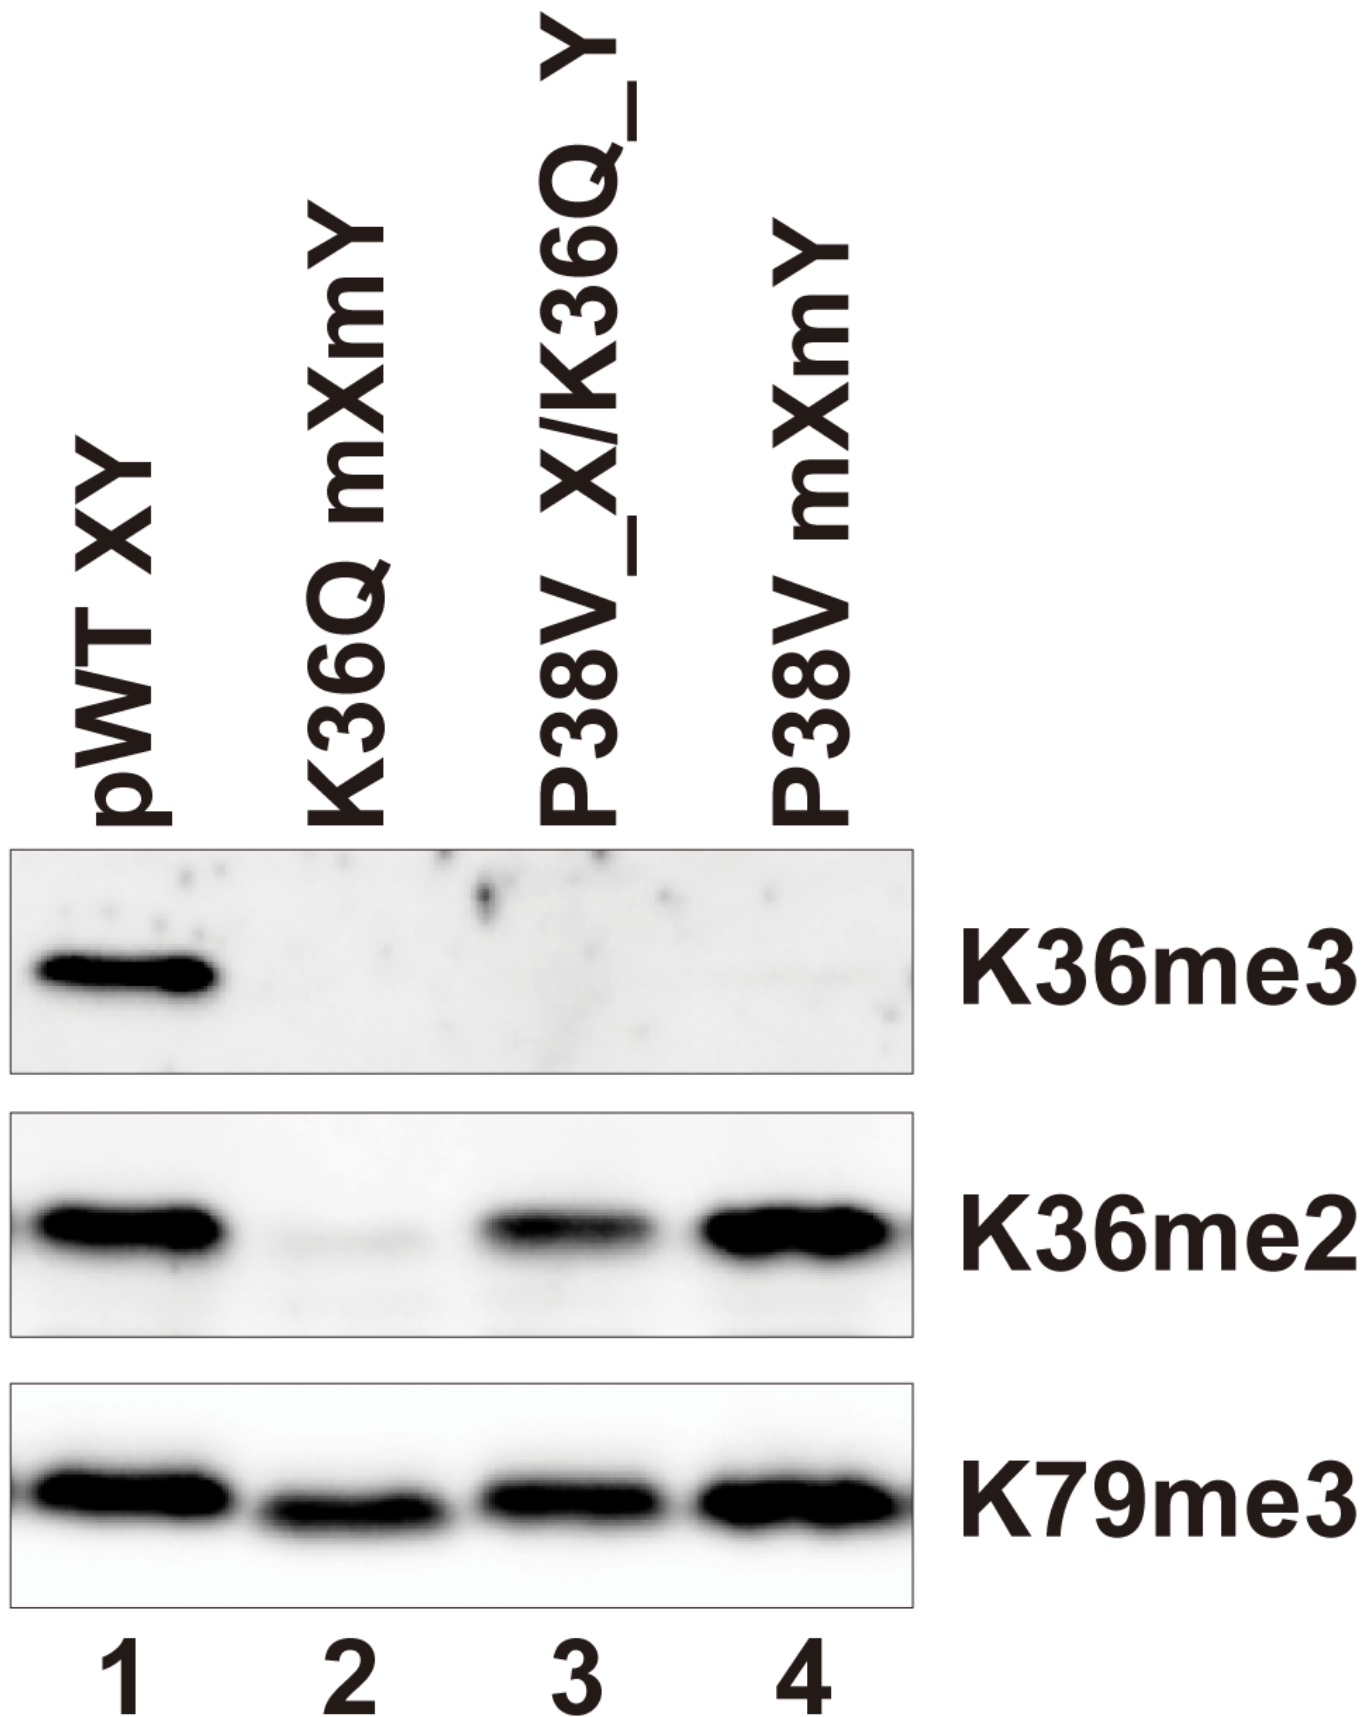

# Figure 5

A

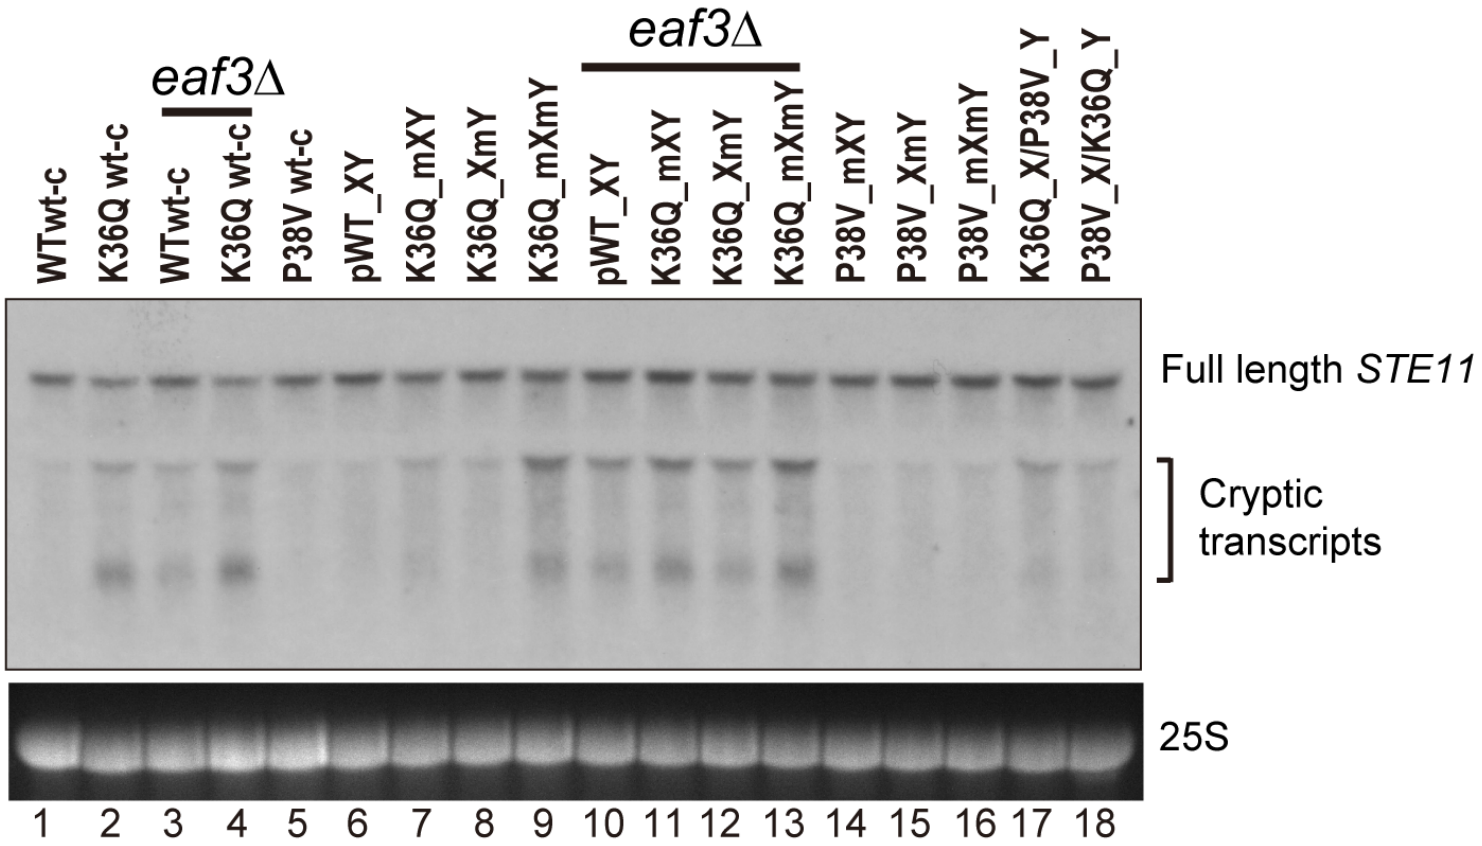

B

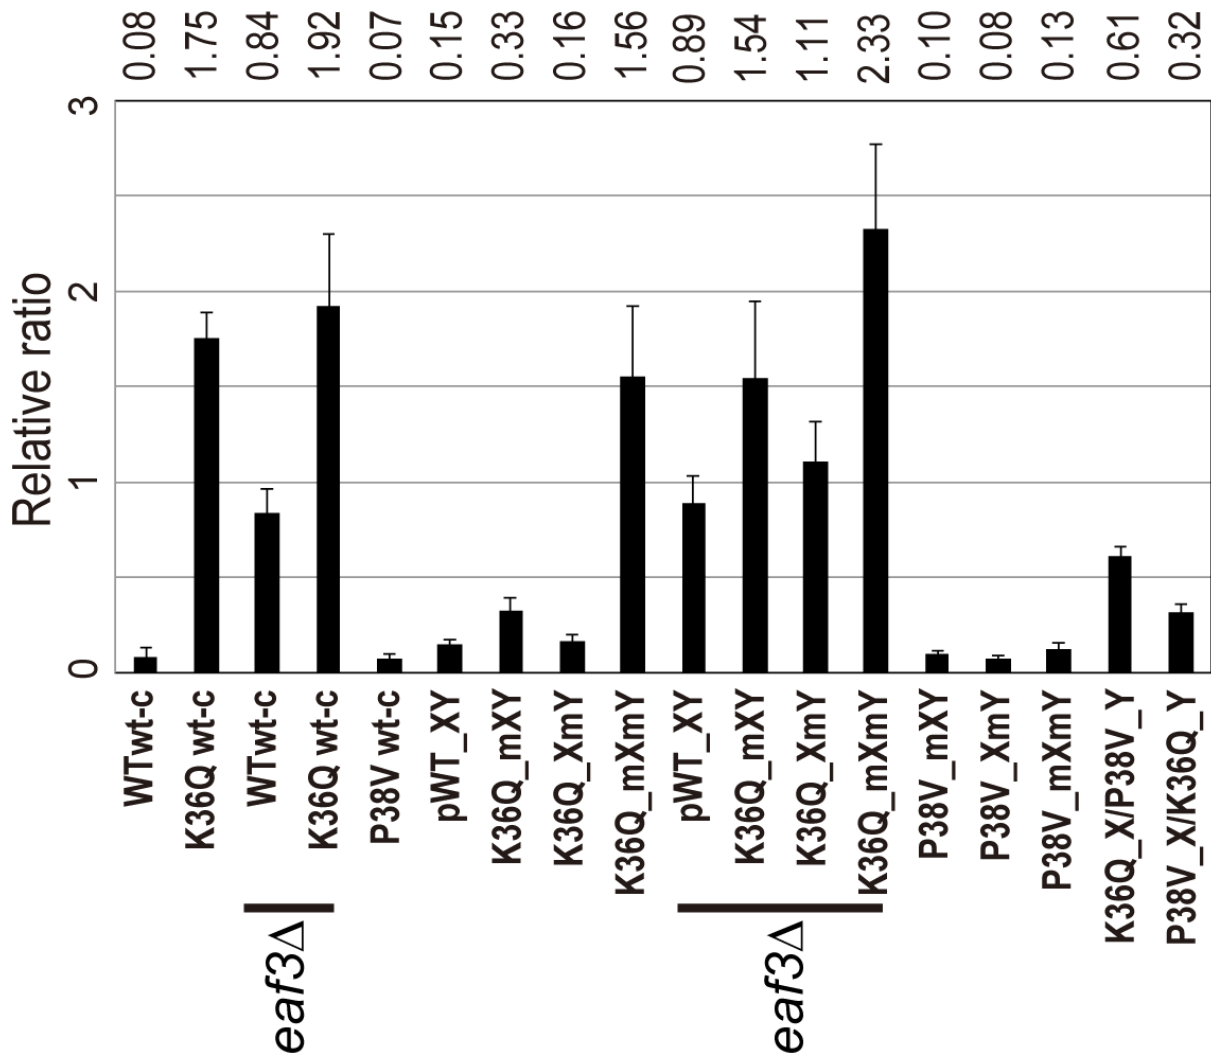

# Figure 5 Supplement 1

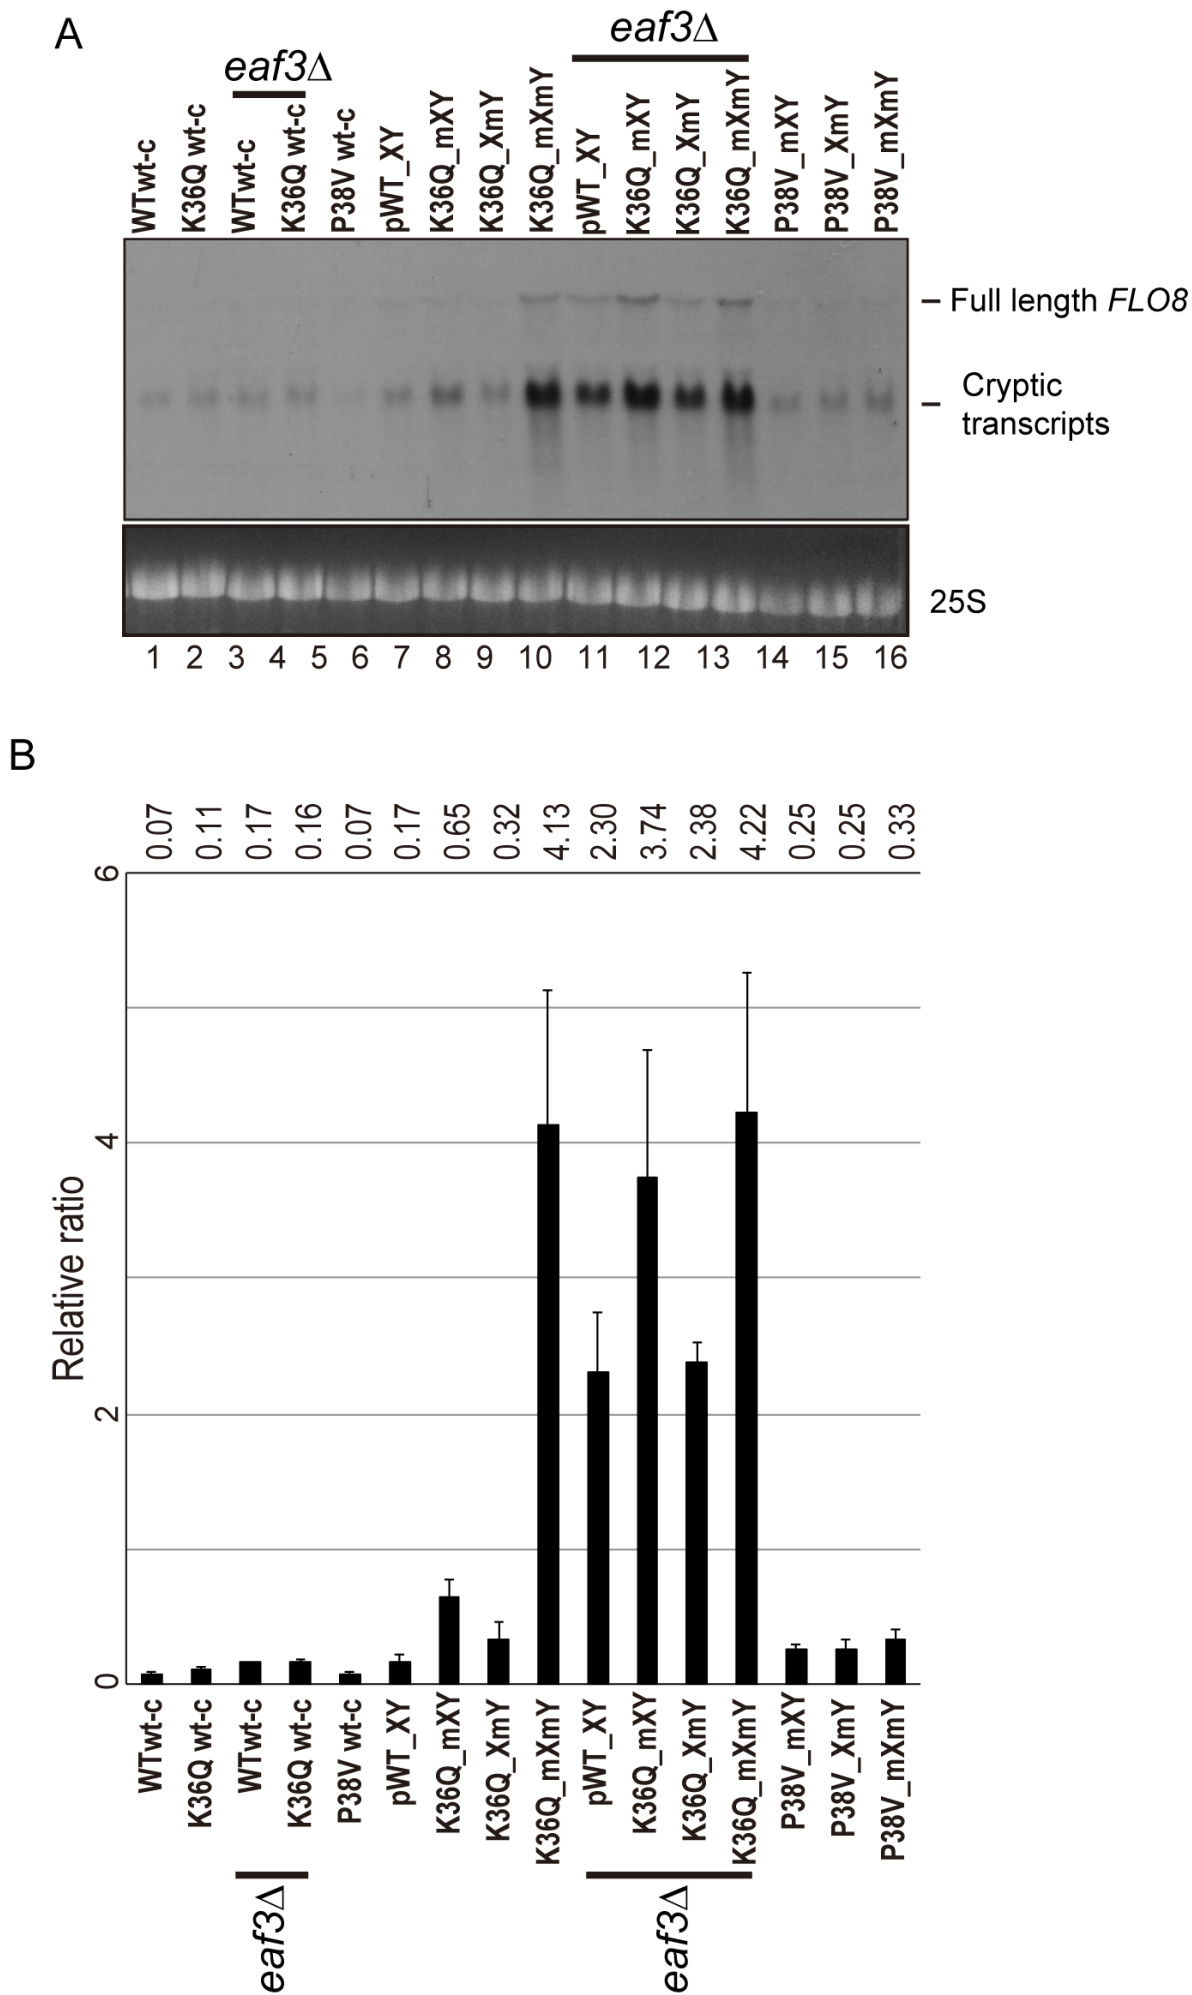



Figure 6

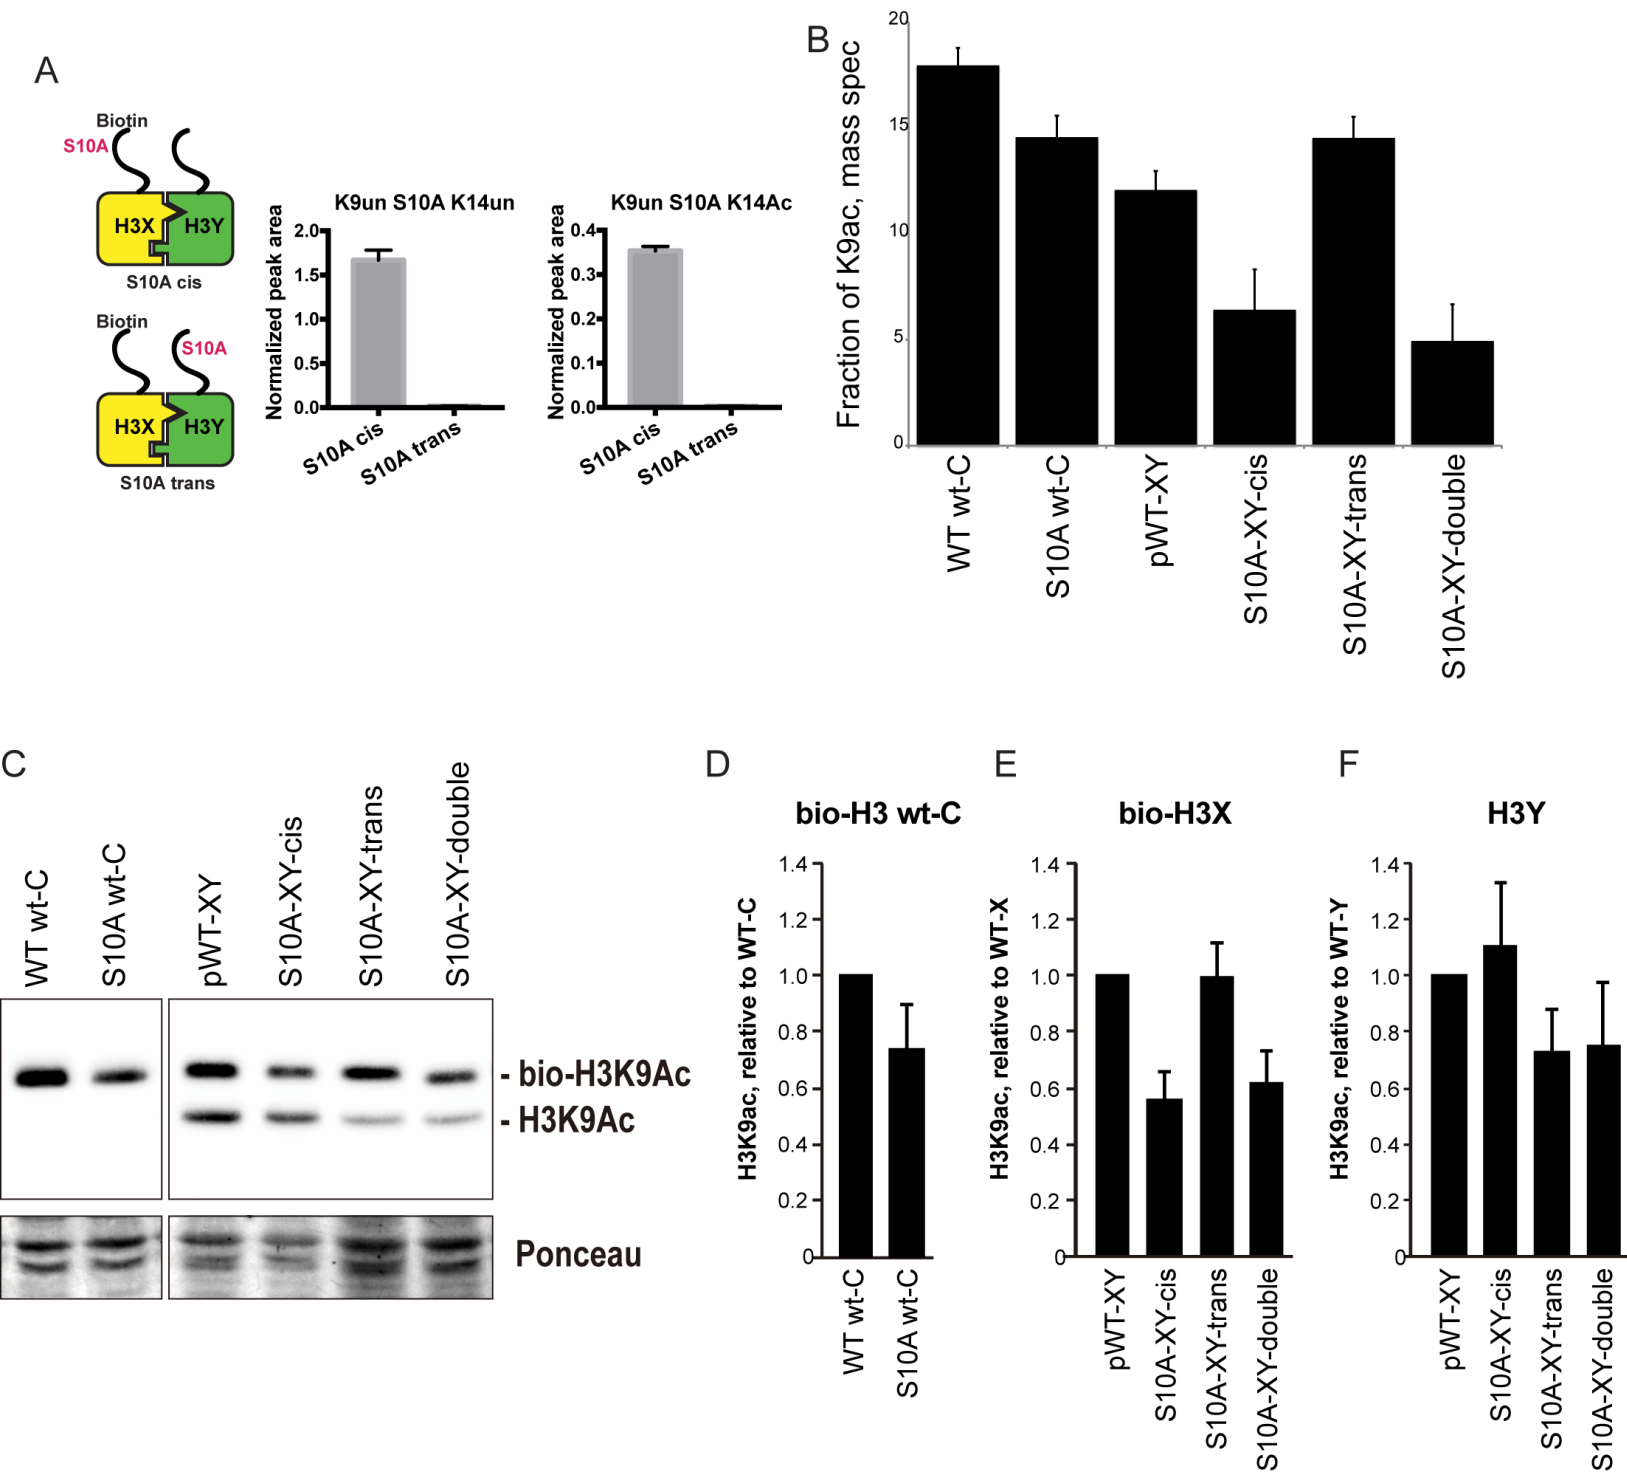

Source: http://biorxiv.org/content/10.1101/170811v2.full.pdf
